1

2 **Coordination of KIF3A and KIF13A regulates leading edge localization of MT1-MMP to**  
3 **promote cancer cell invasion**

4

5 Valentina Gifford, Anna Woskowicz, Noriko Ito, Stefan Balint, Michael L. Dustin, and  
6 Yoshifumi Itoh\*

7 Kennedy Institute of Rheumatology, University of Oxford, Oxford, UK

8 ***Running title: MT1-MMP vesicle transport by KIFs promotes cancer cell invasion***

9

10

11 \*All correspondence should be addressed to:

12 Yoshifumi Itoh, PhD

13 Kennedy Institute of Rheumatology

14 University of Oxford, Oxford, UK

15 e-mail: [yoshi.itoh@kennedy.ox.ac.uk](mailto:yoshi.itoh@kennedy.ox.ac.uk)

16

17

18

19

20

21

22 **ABSTRACT**

23 MT1-MMP plays a crucial role in promoting the cellular invasion of cancer cells by degrading  
24 the extracellular matrix to create a path for migration. During this process, its localization at  
25 the leading edge of migrating cells is critical, and it is achieved by targeted transport of MT1-  
26 MMP-containing vesicles along microtubules by kinesin superfamily proteins (KIFs). Here we  
27 identified three KIFs involved in MT1-MMP vesicle transport: KIF3A, KIF13A, and KIF9.  
28 Knockdown of KIF3A and KIF13A effectively inhibited MT1-MMP-dependent collagen  
29 degradation and invasion, while knockdown of KIF9 increased collagen degradation and  
30 invasion. Our data suggest that KIF9 competes with KIF3A/KIF13A to bring MT1-MMP  
31 vesicles to different locations in the plasma membrane. Live-cell imaging analyses have  
32 indicated that KIF3A and KIF13A coordinate to transport the same MT1-MMP-containing  
33 vesicles. Taken together, we have identified a unique interplay between three KIFs to  
34 regulate leading edge localization of MT1-MMP and MT1-MMP-dependent cancer cell  
35 invasion.

36

37

38

## 39 INTRODUCTION

40 Invasion and metastasis are the life-threatening features of invasive cancer.  
41 Epithelial cancer cells achieve this by losing their cell-cell adhesion property, increasing their  
42 motility, and gaining extracellular matrix (ECM) degrading activity for invasion. It has been  
43 shown that one of the crucial ECM-degrading enzymes allowing cancer cell invasion and  
44 metastasis is membrane-type I matrix metalloproteinase, MT1-MMP(Itoh, 2015; Sabeh et al.,  
45 2004; Sabeh et al., 2009; Sato et al., 1994; Seiki, 2003). MT1-MMP is a type-I  
46 transmembrane proteinase that belongs to the matrix metalloproteinase (MMP) family. MT1-  
47 MMP degrades various ECM components on the cell surface, including fibrillar collagen  
48 (Holmbeck et al., 2004; Itoh, 2015; Ohuchi et al., 1997). MT1-MMP also activates proMMP-  
49 2 and proMMP-13 on the cell surface, expanding proteolytic repertoire(Itoh, 2015). ProMMP-  
50 2 activation is considered essential for epithelial cancer cell invasion and growth since  
51 activated MMP-2, but not MT1-MMP, can degrade type IV collagen, a major component of  
52 the basement membrane(Itoh, 2015; Taniwaki et al., 2007). MT1-MMP also cleaves  
53 membrane proteins, including CD44(Kajita et al., 2001), ICAM-1(Sithu et al., 2007),  
54 LRP1(Rozanov et al., 2004), syndecan 1(Endo et al., 2003), ADAM9(Chan et al., 2012),  
55 Dll1(Jin et al., 2011), EphA2(Koshikawa et al., 2015; Sugiyama et al., 2013), modifying cell  
56 adhesion property and cellular signalling. Thus, MT1-MMP is considered to be a  
57 microenvironment and cell function modifier.

58 Localization of MT1-MMP at the leading edge of migrating cells is crucial to promote  
59 cellular invasion(Ferrari et al., 2019; Gifford and Itoh, 2019; Itoh, 2015). Leading-edge  
60 structures or their precursors include filopodia, lamellipodia, invadopodia, and podosomes,  
61 and MT1-MMP localizes to all of these structure(Ferrari et al., 2019; Gifford and Itoh, 2019;  
62 Itoh, 2015). MT1-MMP also localizes at focal adhesion (FA)(Wang and McNiven, 2012;  
63 Woskowicz et al., 2013). It is thought that localization of MT1-MMP is achieved by direct  
64 transport of MT1-MMP-containing vesicles to these membrane structures(Wiesner et al.,  
65 2010), but the mechanism of vesicle transport of MT1-MMP is still poorly understood.  
66 Vesicle transport is carried out by motor proteins, including kinesin superfamily proteins

67 (KIFs), which transport vesicles and macromolecules along microtubules(Hirokawa et al.,  
68 2009; Hirokawa and Tanaka, 2015). There are 45 KIFs in humans that are classified into  
69 three groups, N-, M- and C-kinesins, according to the position of the microtubule-binding  
70 motor domain(Hirokawa and Tanaka, 2015). KIFs that transport vesicles toward the cell  
71 periphery or the (+) ends of microtubules belong to N-kinesins, which form the largest  
72 subgroup of 39 KIFs and can be further divided into 11 subgroups(Hirokawa et al., 2009;  
73 Hirokawa and Tanaka, 2015). N-kinesins have a motor domain at their N-terminus, followed  
74 by a neck region, a coiled-coil region, and a C-terminal tail region(Hirokawa et al., 2009;  
75 Hirokawa and Tanaka, 2015). It is thought that each KIF can selectively recognize certain  
76 cargos through the specific interaction with adaptor molecules, membrane proteins, or Rab  
77 GTPases through their C-terminal tail region. So far, KIF5B and KIF3A/B have been  
78 reported to transport MT1-MMP vesicles in macrophages (Wiesner et al., 2010). KIF5B and  
79 KIF3A have been reported to play a role in invadopodia localization of MT1-MMP in MDA-  
80 MB231 cells (Marchesin et al., 2015; Thapa and Anderson, 2017). However, the roles of  
81 KIFs in MT1-MMP vesicles trafficking in different cells are not understood.

82 This study aimed to identify KIFs responsible for MT1-MMP localization at the  
83 leading edge of invasive human fibrosarcoma, HT-1080. By screening with siRNAs, we  
84 identified three KIFs (KIF3A, KIF13A, and KIF9) directly involved in MT1-MMP vesicle  
85 trafficking. We report here the co-ordination of KIF3A and KIF13A to transport MT1-MMP  
86 vesicles and the potential competitive role of KIF9 against KIF3A and KIF13A.

87

## 88 **RESULTS**

### 89 **Knockdown of KIF13A, KIF3A, KIF9 and KIF1C alters MT1-MMP-mediated cell functions** 90 **on the cell surface**

91 To identify KIFs responsible for MT1-MMP vesicle transport, we initially narrowed  
92 down the candidate KIFs. There are 45 KIFs in humans, and we initially excluded C- and M-  
93 kinesins since they do not traffic to the (+) ends of microtubules. We further excluded KIFs  
94 reported to be exclusively expressed in neurons or involved in cell division as they are

95 unlikely to control MT1-MMP vesicle trafficking (Supplementary Table S1). This exercise  
96 leaves 17 KIFs, including splicing variants, as candidates for screening. In order to screen  
97 KIFs necessary for MT1-MMP trafficking, we set up a gelatin and collagen film degradation  
98 assay with HT-1080 cells. As shown in Supplementary Figure S1a-d, gelatin and collagen  
99 film degradation were abolished by a broad-spectrum MMP inhibitor GM6001 (10  $\mu$ M) and  
100 by a specific biologic MT1-MMP inhibitor DX-2400 (200nM)(Devy et al., 2009), but not by  
101 TIMP-1 (200 nM), which does not inhibit MT1-MMP but inhibits all soluble and GPI-anchored  
102 MMPs. The data suggested that both gelatin and collagen film degradation activities are  
103 solely dependent on endogenous MT1-MMP in HT1080 cells. We confirmed that HT-1080  
104 cells expressed all 17 KIFs (Supplementary Fig S2a), each KIF gene was silenced by siRNA,  
105 and cells were subjected to gelatin film degradation assay (Figure S2b, c). Among the 17  
106 KIFs, knockdown of KIF1C, KIF3A, and KIF13A notably decreased gelatin film degradation,  
107 while knockdown of KIF9 rather increased gelatin film degradation (Figure S2b). Therefore,  
108 we investigated KIF1C, 3A, 13A and 9 further.

109 Knockdown of KIF13A, KIF3A, and KIF1C notably decreased MT1-MMP-mediated  
110 gelatin film degradation, whereas the knockdown of KIF9 enhanced it in a statistically  
111 significant manner compared to non-targeting siRNA (si-NT) transfected cells ( $P < 0.0001$ )  
112 (Figure 1a). Western Blotting for KIF3A and KIF1C and by RT-PCR for KIF13A and KIF9  
113 (Figure 1d, top and middle panels) confirmed the efficiency of silencing. Interestingly, siRNA  
114 for KIF9 by smart pool siRNA (si-KIF9) was selective for KIF9-v1 (knocked down by more  
115 than 90%), as KIF9-v2 and -3 mRNA level were knocked down only by 39%. We also  
116 confirmed that silencing any of these *kinesin* genes did not alter MT1-MMP mRNA levels  
117 (Figure 1d, bottom panel). Since it has been reported that KIF5B mediates MT1-MMP  
118 intracellular trafficking in primary macrophages and breast cancer cell line, MDA-  
119 MB231(Marchesin et al., 2015; Thapa and Anderson, 2017; Wiesner et al., 2010), we also  
120 re-examined KIF5B knockdown in HT-1080 cells. We confirmed that KIF5B knockdown did  
121 not affect gelatin film degradation (Figure 1e). Next, we examined the effect of KIF  
122 knockdown on the collagenolytic activity of MT1-MMP in HT-1080 cells as the type I collagen

123 represents its physiological substrate. As shown in Figure 1b, KIF13A, KIF3A, and KIF1C  
124 knockdowns decreased collagen degradation by HT1080 cells, while the knockdown of KIF9  
125 enhanced it in a statistically significant manner (Figure 1b, right panel).

126 Another cell surface activity of MT1-MMP is proMMP-2 activation. ProMMP-2  
127 activation can be induced by adding collagen I (100 µg/ml) in the culture medium (Majkowska  
128 et al., 2017). We confirmed that the collagen-induced proMMP-2 activation is due to MT1-  
129 MMP in HT-1080 cells (Supplementary Figure S1e, f). As indicated in Figure 1c, the  
130 conditioned medium from si-NT-transfected cells, without collagen, showed proMMP-2  
131 (ProMMP-2, 68 kDa) and its intermediate form (Intermediate, 65 KDa) (Figure 1c, left panel).  
132 Silencing *Kif13a*, *Kif3a*, and *Kif1c* genes prevented the generation of the intermediate form,  
133 whereas silencing the *Kif9* gene accelerated proMMP-2 processing to its intermediate and  
134 active forms (Active form, 62 kDa, Figure 1c, left panel). Upon collagen stimulation, around  
135 71% of proMMP-2 was converted to its active form in si-NT-transfected cells (Figure 1c,  
136 center lower panel). The knockdown of KIF13A and KIF3A significantly reduced the  
137 activation down to 26% and 25%, respectively. Knockdown of KIF1C seemed to moderately  
138 decrease it to 44% (Figure 1c, center lower panel). Conversely, silencing the *Kif9* gene  
139 enhanced the activation to around 80% in a statistically significant manner (Figure 1c, center  
140 lower panel). Interestingly, we noted that the generation of the 45 KDa processed form of  
141 MT1-MMP, which has been shown to coincide with functional activation of MT1-MMP, was  
142 also affected by KIF knockdown (Figure 1c, left panel) (Stanton et al., 1998). The knockdown  
143 of KIF13A, KIF3A, and KIF1C significantly reduced the generation of the 45 kDa form  
144 (Figure 1c, left and right panels), while the knockdown of KIF9 have a tendency to increase  
145 it. However, the effect was statistically not significant (Figure 1c, left and right panels).

146

#### 147 **Knockdown of KIF13A, KIF3A, KIF9 and KIF1C alters MT1-MMP localization at the cell-** 148 **matrix interface**

149 The cell surface biotinylation experiment indicated that KIF knockdown did not affect  
150 the overall cell surface level of MT1-MMP (Figure 2a). This result was also confirmed by

151 immunofluorescence staining of the cell surface MT1-MMP (Figure 2b). Therefore, we  
152 hypothesized that the KIF knockdown shifts the localization of MT1-MMP to or from the cell-  
153 matrix interface. We employed total internal reflection fluorescent (TIRF) microscopy to  
154 examine the levels of MT1-MMP at the ventral side of the membrane. As shown in Figure  
155 2c, silencing *Kif13a* and *Kif3a* genes significantly reduced MT1-MMP localization at the cell-  
156 matrix interface, whereas the knockdown of KIF9 increased it (Figure 2c). Knockdown of  
157 KIF1C did not change MT1-MMP localization significantly (Figure 2c). The knockdown of  
158 these KIFs did not influence cellular attachment to the gelatin, as it did not impact the level  
159 of  $\beta 1$  integrin (Figure 2d) and close cell-matrix contacts detected by interference reflection  
160 microscopy (IRM) (Figure 2d, top panel). Taken together, these data indicate that knocking  
161 down KIF3a, KIF13a and KIF9 altered MT1-MMP-dependent activity by changing the level of  
162 MT1-MMP localization at the cell-matrix interface.

163

164 **The knockdown of KIF13A, KIF3A and KIF9 alters MT1-MMP-mediated cell invasion**  
165 **through a microporous membrane and MT1-MMP-dependent cell migration in 3D**  
166 **collagen.**

167 We next examined the effect of KIF knockdown on MT1-MMP-dependent cell  
168 invasion. We employed two different invasion assays: collagen invasion assay using trans-  
169 well chambers coated with collagen gel (Figure 3a) and microcarrier bead invasion assay  
170 that assesses migration distance of cells from the beads' surface within 3D collagen gel  
171 (Figure 3b). The cellular invasion in these assays is entirely dependent on endogenous  
172 MT1-MMP in HT-1080 cells (Figure S1f, g). As shown in Figure 3a (bottom right panel), the  
173 knockdown of KIF13A and KIF3A significantly decreased the invasion, whereas KIF9  
174 knockdown significantly enhanced it in the trans-well invasion assay. KIF1C knockdown did  
175 not affect the cell invasion (Figure 3a, bottom right panel). In microcarrier bead invasion  
176 assay (Figure 3b), the knockdowns of KIF13A, KIF3A, and KIF1C significantly reduced cell  
177 migration. Interestingly, si-KIF9-transfected cells also migrated significantly less (Figure 3b),  
178 which is contrary to the trans-well invasion assay (Figure 3a). The effect of knockdown of

179 KIF13A, KIF3A, and KIF9 on cellular invasion was not due to alteration on the fundamental  
180 cell migration machinery. These cells migrated similarly on the plastic surface as measured  
181 by a wound-healing assay (Figure 3c). On the other hand, KIF1C knockdown slightly  
182 decreased it ( $P = 0.019$ ), indicating that KIF1C may be involved in the general cell migration  
183 (Figure 3c).

184

### 185 **KIF13A and KIF3A co-localize with MT1-MMP-containing vesicles**

186 Next, the cellular distribution of MT1-RFP and GFP-tagged KIF13A, KIF3A, KIF9-v1,  
187 KIF9-v2, and KIF1C were analyzed. As shown in Figure 4a, KIF13A-GFP co-localized with  
188 MT1-RFP, and the two proteins exhibited a similar distribution pattern within the perinuclear  
189 (white box) and the cell periphery areas (orange box). KIF3A-GFP also co-localized with  
190 MT1-RFP-positive vesicles within the perinuclear region (Figure 4b, white box), but the two  
191 proteins did not colocalize at the cell periphery (Figure 4b, orange box). KIF9-v1-GFP  
192 colocalized with MT1-RFP within the perinuclear region (Figure 4c, White box), but not cell  
193 periphery (Figure 4c, orange box). KIF9-v2-GFP- and KIF1C-GFP-transfected cells did not  
194 show a clear vesicular-like distribution of MT1-RFP clearly, and neither KIF9-v2-GFP nor  
195 KIF1C-GFP showed co-localization with MT1-RFP neither in perinuclear nor cell periphery  
196 region (Figure 4d and e). It was interesting to note that KIF1C-GFP strongly accumulated at  
197 the tips of the trailing edges (Figure 4e, orange box). Pearson's correlation coefficients  
198 (PCCs) confirmed that KIF13A-GFP and KIF3A-GFP had the highest degree of co-  
199 localization (Figure 4f). On the other hand, KIF9-v2-GFP and KIF1C-GFP exhibited the least  
200 co-localization with MT1-RFP. These cells were also embedded in a 3D collagen matrix and  
201 imaged by confocal microscopy (Figure 4g-i). The data confirmed that KIF13A-GFP  
202 exhibited the highest co-localization with MT1-RFP (Figure 4g, i), whereas KIF3A-GFP co-  
203 localization was found only within the perinuclear region (Figure 4h, i). We confirmed no co-  
204 localization of KIF9-v2-GFP and KIF1C-GFP with MT1-RFP under these conditions (Figure  
205 4j-i).

206



## 207 **KIF13A, KIF3A and KIF9-v1 transport MT1-MMP-containing vesicles**

208           These cells were next subjected to time-lapse imaging using confocal microscopy.  
209   The expression of KIF13A-GFP often made a distribution of MT1-RFP signals into a tubular-  
210   like shape, extending from the perinuclear regions towards the tips of the ruffling membrane  
211   (Figure 5a). Numerous KIF13A-GFP signals were observed moving along these MT1-RFP  
212   tubular-like structures, accumulating at the cell periphery, suggesting that the tubular-like  
213   structures are microtubules, and MT1-RFP seems to be distributed over the microtubules  
214   (supplemental *movie S1*). Vesicles double positive for KIF13A-GFP and MT1-RFP could  
215   also be detected within the perinuclear area. Despite MT1-RFP strongly accumulated within  
216   this region, it was possible to observe KIF13A-GFP transporting MT1-RFP-containing  
217   vesicles (Figure 5b, *movie S2*). No significant differences were observed in velocity or size  
218   of vesicles between the the cell periphery or within the perinuclear area (Figure 5c, d).

219           We also carried out live cell imaging on TIRF microscopy (Figure 5e, *movie S3*) and  
220   the vesicles positive for KIF13A-GFP and MT1-RFP were detected at the cell-matrix  
221   interface. Combining time-lapse IRM with time-lapse TIRF microscopy, we also observed  
222   that MT1-RFP progressively accumulated at the growing adherent membrane on a gelatin-  
223   coated glass surface (Figure 5f). As discussed above, MT1-RFP-positive vesicles were  
224   again distributed in tubular-like structures, which pointed toward the growing highly adherent  
225   membrane (Figure 5f, *movie S4*)

226           Expression of KIF3A-GFP in HT-1080 cells did not affect the shape of MT1-RFP-  
227   positive vesicles (Figure 5g, h). The vesicles positive for KIF3A-GFP and MT1-RFP were  
228   either moving linearly (Figure 5g, *movie S5*) or oscillatory within the perinuclear region  
229   (Figure 5h, *movie S6*). Their mean velocities and diameters were equal, regardless of their  
230   trajectory (Figure 5i, j).

231           Vesicles double positive for KIF9-v1-GFP and MT1-RFP were detected within the  
232   perinuclear area of HT-1080 cells (Figure 6a). These vesicles did not move, but their  
233   fluorescence intensity faded over time, suggesting that the vesicles moved out of the focus  
234   plane, along the z-axis, most likely towards the dorsal side of the cell. As shown in

235 Supplementary Figure 6b, no vesicles positive for both KIF9-v2-GFP and MT1-RFP could be  
236 detected. Likewise, we could not observe any MT1-RFP-positive vesicles trafficked by  
237 KIF1C-GFP (Figure 6c). Once more, KIF1C-GFP was accumulated at the trailing edge  
238 (Figure 6c).

239

#### 240 **Collaboration of KIF13A and KIF3A and competition of KIF9-v1 with KIF13A/KIF3A to** 241 **transport MT1-MMP vesicles**

242 We next investigated if KIF13A and KIF3A transport MT1-MMP vesicles  
243 independently or in collaboration. HT-1080 cells transfected for si-KIF13A, si-KIF3A, and a  
244 combination of the two were subjected to gelatin film degradation (Figure 7a, b, c). If these  
245 KIFs work independently, double knockdown of KIF3A and KIF13A should show additive  
246 inhibitory effect. However, if they work in collaboration, such an effect should not be  
247 observed. Upon KIF13A knockdown, gelatin film degradation was decreased by around  
248 78%, while KIF3A knockdown by 49%. When the two knockdowns were combined, gelatin  
249 film degradation was decreased by 82%, which is the same level as KIF13A knockdown  
250 alone (Figure 7a, b). These data suggest that these two motor proteins function on the same  
251 pathway to deliver MT1-MMP to the cell surface.

252 Next, HT-1080 cells expressing KIF13A-GFP, KIF3A-HaloTag, and MT1-RFP were  
253 subjected to time-lapse imaging. Vesicles positive for all three signals were detected within  
254 the perinuclear region (Figure 7d, e). As pointed by the arrows colored according to the  
255 different channels, these vesicles moved from the perinuclear area towards the cell  
256 periphery (Figure 7d). KIF13A-GFP and KIF3A-HaloTag co-localized with MT1-RFP-,  
257 containing vesicle until MT1-RFP fluorescence signal had faded, indicating that the MT1-  
258 RFP vesicle had fused with the plasma membrane (Figure 7d). Then, KIF13A-GFP and  
259 KIF3A-HaloTag independently trafficked back towards the center of the cell (Figure 7d). In  
260 other cases, these vesicles positive for KIF13A-GFP, KIF3A-HaloTag, and MT1-RFP were  
261 oscillating within the perinuclear region (Figure 7e). On the other hand, vesicles at the cell  
262 periphery were positive for only KIF13A-GFP and MT1-RFP (Figure 7f, *movie S7*). These

263 vesicles were either moving within the cell edge or the perinuclear region. Interestingly, with  
264 KIF3A-HaloTag expression, KIF13A-GFP- and MT1-RFP-positive vesicles moved  
265 significantly faster at the cell edge within the perinuclear area (Figure 7g). With KIF13A-GFP  
266 expression, KIF3A-HaloTag- and MT1-RFP-positive vesicles moved significantly faster when  
267 they were proceeding with a linear trajectory than when they were oscillating (Figure 7h).  
268 Taken together, we concluded that KIF13A and KIF3A co-traffic MT1-MMP-containing  
269 vesicles around the perinuclear areas, and KIF13A takes over the vesicles at the periphery  
270 to traffic them towards the plasma membrane of the cell.

271         Given the role of KIF3A and KIF13A in MT1-MMP vesicle transport to degrade  
272 matrix, increased matrix-degrading activity upon KIF9 knockdown may be due to increased  
273 KIF3A and KIF13A-mediated vesicle transport of MT1-MMP. To test this hypothesis, *Kif9*  
274 was co-silenced with *Kif3a* or *Kif13a*. As shown in Figure 8, increased gelatin film  
275 degradation by KIF9 knockdown was significantly decreased upon co-silencing *Kif3a* or  
276 *Kif13a* genes. These data suggest that knockdown of KIF9 made MT1-MMP vesicles  
277 available for KIF3A- and KIF13A-dependent vesicle transport, resulting in increased matrix  
278 degradation.

279

## 280 **Role of KIF13A, KIF3A, KIF9 and KIF1C in MT1-MMP secretion in other cell types**

281         We next investigated the role of these KIFs in other cell types. First, human  
282 rheumatoid arthritis synovial fibroblasts (RASFs) were examined since RASFs' cell surface  
283 collagenolytic activity is solely MT1-MMP-dependent (Kaneko et al., 2016; Majkowska et al.,  
284 2017; Miller et al., 2009). RASFs from three different donors were transfected with siRNAs  
285 targeting these four KIFs and subjected to collagen film degradation assay. As shown in  
286 Figure 9 (a-c), knockdown of KIF13A and KIF3A significantly reduced collagen film  
287 degrading activity, while KIF9 knockdown enhanced it. KIF1C knockdown did not influence  
288 the collagen degradation. These data suggest that KIF13A, KIF3A, and KIF9 are similarly  
289 involved in MT1-MMP intracellular trafficking in RASFs.

290 Next, triple-negative breast cancer cell line, MDA-MB-231 cells were examined.  
291 MDA-MB-231 cells have been characterized extensively for invadopodia-mediated cell  
292 invasion, which is also MT1-MMP-dependent (Castro-Castro et al., 2016; Ferrari et al., 2019;  
293 Frittoli et al., 2011; Infante et al., 2018; Poincloux et al., 2009). MDA-MB-231 cells were  
294 transfected with siRNAs targeting KIF13A, KIF3A, KIF9, KIF1C, and KIF5B and subjected to  
295 gelatin film degradation (Figure 9d-f). Interestingly, silencing these five *kinesin* genes,  
296 including KIF3A and KIF5B previously shown to associate with MT1-MMP-containing  
297 vesicles in MDA-MB-231 cells (Marchesin et al., 2015; Wang et al., 2017), did not impact  
298 MT1-MMP- and invadopodia-dependent gelatin film degradation (Figure 9d, e). These data  
299 suggest that roles of KIFs in trafficking MT1-MMP-containing vesicles are cell context-  
300 dependent.

301

### 302 **Genomic alterations of *Kif13a* and *Kif9* genes across The Cancer Genome Atlas** 303 **(TCGA) studies**

304 We next investigated if expression level of KIF3A, KIF13A and KIF9 have any  
305 correlation with cancer progression. Gene expression of KIF13A, KIF3A, and KIF9 across  
306 The Cancer Genome Atlas (TCGA) PanCancer Atlas studies were analyzed. Amplifications  
307 and deep deletions of *Kif13a*, *Kif3a*, and *Kif9* genes across the TCGA database were  
308 searched on cBioPortal (<http://cbioportal.org>) (Cerami et al., 2012; Gao et al., 2013). The  
309 term amplification indicates a high copy-number level per gene. Deep deletion implies a  
310 profound loss in the copy-number level per gene and often refers to a homozygous deletion.  
311 As shown in Figure 10a, the *Kif13a* gene was amplified in 1.3% of samples across the  
312 TCGA PanCancer Atlas studies and deleted in 0.2%. On the other hand, the *Kif9* gene was  
313 amplified in only 0.1% of samples and deleted in 0.5%. These gene alterations were  
314 distributed across several cancer types of TCGA (Figure 10b, c). More than seven in 100  
315 women diagnosed with ovarian serous cystadenocarcinoma presented a *Kif13a* gene  
316 amplification (Figure 10b). *Kif13a* gene was also amplified in more than 6% and 4% of  
317 patients diagnosed with bladder urothelial cancer and diffuse large-B cell lymphoma (DLBC),

318 respectively (Figure 10b). *Kif9* gene was deleted in over 6 out of 100 patients diagnosed with  
319 DLBC and in almost 3% of patients with kidney renal clear cell carcinoma (ccRCC) (Figure  
320 9c). Next, we used the Pathology Atlas  
321 (<https://www.proteinatlas.org/humanproteome/pathology>)(Uhlen et al., 2017) to investigate  
322 whether KIF13A and KIF9 are considered prognostic markers for specific cancer types. We  
323 performed Kaplan-Meier survival analysis of liver cancer patients with low or high mRNA  
324 expression of the *Kif13a* gene through the Pathology Atlas. We found that patients with high  
325 expression of the *Kif13a* gene had a significantly lower survival rate (Figure 10d). We also  
326 performed the same analysis of renal and colorectal cancer patients with low or high mRNA  
327 expression of the *Kif9* gene. We found that patients with low expression had a significantly  
328 lower survival rate (Figure 10e, f).

329 *Kif3a* gene was amplified in 0.5% of cases across the TCGA PanCancer Atlas  
330 studies and deleted in 0.3% of them (Figure S3a). 5% of patients with ccRCC presented an  
331 amplification of the *Kif3a* gene. However, we could not assess whether this gene alteration  
332 was associated with a change to the overall patients' survival (Figure S3b). According to our  
333 search on the Pathology Atlas, *Kif3a* gene alterations are not considered prognostic markers  
334 for different cancer types.

335

## 336 **DISCUSSION**

337 When invading cancer cells encounter a physical ECM barrier with narrow gaps of  
338 less than 7  $\mu\text{m}$  in diameter, they utilize MT1-MMP to break through the barrier and create a  
339 path for migration (Wolf et al., 2013). In this process, cells directly secrete MT1-MMP to the  
340 invading edge by trafficking MT1-MMP-containing vesicles along microtubules. Here, we  
341 have identified three kinesin motor proteins, KIF3A, KIF13A, and KIF9, directly involved in  
342 the trafficking of MT1-MMP-containing vesicles to the leading edge.

343 Although knockdown of KIF1C significantly reduced gelatin and collagen film  
344 degradation like KIF3A and KIF13A knockdown, we could not get the evidence that KIF1C  
345 was directly involved in MT1-MMP vesicle transport. MT1-RFP and KIF1C-GFP did not co-

346 localize when cells were cultured either on a gelatin film or within 3D collagen gel, and there  
347 was a strong tendency of KIF1C to localize at the trailing edge of migrating cells rather than  
348 at the leading edge. A similar conclusion was made by Weisner *et al.* (Wiesner et al., 2010),  
349 as they observed that KIF1C knockdown decreased MT1-MMP-dependent gelatin film  
350 degradation at podosomes, but KIF1C did not co-localize with MT1-MMP vesicles. KIF1C  
351 may affect MT1-MMP vesicle transport indirectly, by potentially influencing cell migration  
352 machinery, as knockdown of KIF1C, but not other KIFs, reduced cell migration on plastic  
353 significantly (Figure 3c), which is an MT1-MMP-independent process. Therefore, KIF3A and  
354 KIF13A are the major KIFs that directly traffic MT1-MMP vesicles to the leading edge in  
355 HT1080 cells.

356 Interestingly, the same effect of knockdown of KIF3A, KIF13A and KIF9 was also  
357 observed for proMMP-2 activation activity. We and others have previously reported that  
358 homodimer formation of MT1-MMP is essential for proMMP-2 activation on the cell surface  
359 to form a proMMP-2 activation complex of (MT1-MMP)<sub>2</sub>-TIMP-2-proMMP-2 (Gifford and Itoh,  
360 2019; Itoh, 2015; Itoh et al., 2001; Lehti et al., 2002). We have previously reported that  
361 homodimerization of MT1-MMP occurs consistently at the leading edge of invading cells  
362 regulated through the re-organization of the cytoskeletal actin by Rac1 and Cdc42 (Itoh et al.,  
363 2011). Thus, the leading-edge localization of MT1-MMP via the vesicle transport by KIF3A  
364 and KIF13A may closely associate with proMMP-2 activation activity.

365 Our data suggest that MT1-MMP vesicles were initially trafficked by both KIF3A and  
366 KIF13A in coordination around the perinuclear area, and then KIF13A alone further  
367 transports the vesicles to the leading edge. To our knowledge, this is the first example of  
368 coordinated vesicle transport between KIF3A and KIF13A. KIF3A belongs to the kinesin-2  
369 subfamily and has been shown to play a crucial role in the primary cilium formation  
370 (Hirokawa, 2000). It was shown that KIF3 is involved in post-Golgi transport of N-cadherin/ $\beta$ -  
371 catenin, which plays a role in the adhesion of neuronal progenitor cells (Teng et al., 2005).  
372 KIF13A belongs to the kinesin-3 subfamily and is known to mediate vesicle transport from  
373 the endosomal recycling compartment to the plasma membrane (Hirokawa et al., 2009;

374 Nakagawa et al., 2000; Perez Bay et al., 2013). It has been shown that KIF13A, together  
375 with Rab22A and BLOC1/2, plays a central role in the biogenesis of recycling endosomes  
376 (Shakya et al., 2018). Trans-Golgi network (TGN) is the last station of the secretory pathway  
377 of proteins, and after TGN, the cargo can be trafficked to three destinations: 1) the plasma  
378 membrane, 2) the secretory granules, and 3) the endosomes (Le Borgne and Hoflack, 1998).  
379 MT1-MMP is stored in endosomes upon endocytosis (Jiang et al., 2001; Planchon et al.,  
380 2018; Remacle et al., 2003), and during exocytosis (Pedersen et al., 2020). With our data  
381 that KIF13A knockdown significantly inhibited MT1-MMP activity on the cell surface, we  
382 speculate that KIF3A and KIF13A transport MT1-MMP vesicles from TGN to the endosome,  
383 and KIF13A further transports the vesicles from the endosomes to the plasma membrane.

384 There are three splicing variants of KIF9, KIF9-v1, -v2, and -v3. KIF9-v2 and -v3  
385 encode identical amino acid sequences, while KIF9-v1 is 65 amino acids shorter in the  
386 coiled-coil region. Upon KIF9 knockdown using smart pool siRNA, KIF9-v1 was selectively  
387 knocked down. Interestingly co-localization with MT1-MMP vesicles was only observed with  
388 KIF9-v1, but not KIF9-v2. Therefore, increased gelatin and collagen film degradation and  
389 proMMP-2 activation resulted from KIF9 knockdown were most likely attributed to KIF9-v1  
390 knockdown, which is the first example of functional difference between KIF9 variants.  
391 However, it is not clear why KIF9-v1, but not KIF9-v2, is selectively involved in MT1-MMP  
392 vesicle transport since KIF9-v1 and v2 share the same C-terminal tail region, where these  
393 KIFs are thought to interact with the cargo. Further investigation is required.

394 Live-cell imaging data indicated that the vesicles positive for MT1-RFP and KIF9-v1-  
395 GFP did not move much in a lateral direction. However, they faded out from the focus plane  
396 over time, suggesting that KIF9 may carry the vesicles to the dorsal side of the cell surface.  
397 Increased gelatin film degradation upon KIF9 knockdown was inhibited by co-silencing  
398 *kif13a* or *kif3a* genes, suggesting that the increased degradation is due to increased  
399 KIF13A- and KIF3A-dependent MT1-MMP vesicle transport to the matrix attachment sites. It  
400 is thus possible that KIF9-v1 competes with KIF13A and KIF3A to bring MT1-MMP-  
401 containing vesicles to different plasma membrane domains. Upon KIF9-v1 knockdown,



402 vesicle transport by KIF13A and KIF3A starts to dominate, resulting in increased matrix  
403 degradation.

404 KIF9 knockdown increased cellular invasion in trans-well invasion assay, with the  
405 same tendency observed for gelatin and collagen film degradations. However, KIF9  
406 knockdown significantly reduced cell migration in microcarrier beads invasion assay. This  
407 seemingly contradictory result can be due to differences between the two invasion assay  
408 systems. The first difference is whether cells face the collagen only at the ventral side (trans-  
409 well system) or surrounded by collagen fibrils (micro-carrier beads system). Another  
410 difference can be whether the migration is chemoattractant-guided or matrix-guided. In the  
411 trans-well system, the lower chamber contained 10% FBS, while the upper chamber was  
412 serum-free. Thus, cells in the upper chamber are attracted by the serum components such  
413 as lysophosphatidic acid (Idzko et al., 2004) in the lower chamber. In the microcarrier beads  
414 invasion assay, there are no chemoattractant gradients. Thus, cells are instead guided by  
415 collagen fibrils. When cells migrate through the 3D collagen matrix, cells enlarge the gaps of  
416 collagen fibrils by degrading it at the middle of pseudopods in a ring shape (Wolf et al., 2013;  
417 Wolf et al., 2007). KIF9 may be involved in the vesicle trafficking of MT1-MMP to these  
418 regions of the plasma membrane in coordination with KIF3A and KIF13A. KIF9 was  
419 previously shown to be involved in gelatin degradation at podosomes in macrophages  
420 (Cornfine et al., 2011). In that report, they found that reggie/flotillin interacts with the C-  
421 terminal cargo binding domain of KIF9, and knockdown of KIF9 or flotillin significantly  
422 reduced gelatin degradation at the podosomes (Cornfine et al., 2011). However, it was  
423 concluded that KIF9 was not directly involved in MT1-MMP vesicle transport to the  
424 podosomes in macrophages (Cornfine et al., 2011; Wiesner et al., 2010).

425 Our data in this study indicate that knockdown of KIF3A and KIF13A in human  
426 RASFs significantly reduced collagen film degradation. In contrast, KIF9 knockdown  
427 enhanced it (Figure 8), suggesting that RASFs share the same vesicle transport mechanism  
428 with HT1080 cells. On the other hand, knockdown of KIF3A, KIF13A, KIF9 did not influence  
429 invadopodia-mediated gelatin film degradation in MDA-MB231 cells (Figure 9d, e). Thus,



430 motor proteins responsible for MT1-MMP vesicle transport are cell context-dependent. It has  
431 been reported that KIF5B and KIF3A/KIF3B are the responsible KIFs in trafficking MT1-MMP  
432 vesicles to the podosome in macrophages (Wiesner et al., 2010). KIF5B and KIF3A were  
433 also shown to mediate MT1-MMP vesicle transport to the invadopodia in MDA-  
434 MB231 (Marchesin et al., 2015). However, our data indicate that knockdown of none of the  
435 KIFs we examined, including KIF5B, KIF13A, KIF3A, KIF9, and KIF1C, influenced  
436 invadopodia-mediated gelatin film degradation in MDA-MB231 cells. In HT1080 cells, KIF5B  
437 knockdown did not influence gelatin film degradation as well. One of the differences between  
438 these reports and our data is that we have analyzed endogenous MT1-MMP activity on the  
439 cell surface in both MDA-MB231 and HT1080 cells, while in these reports, KIF5B  
440 involvement was investigated on ectopically expressed mCherry-tagged MT1-MMP in both  
441 macrophages and MDA-MB231 (Marchesin et al., 2015; Wiesner et al., 2010). Since  
442 mCherry was inserted at the C-terminus of the cytoplasmic domain of MT1-MMP (Marchesin  
443 et al., 2015; Wiesner et al., 2010), the vesicle transport pathway of MT1-mCherry may differ  
444 from endogenous wild-type MT1-MMP. It is also possible that overexpressed enzyme may  
445 gain alternative vesicle trafficking pathways. Another possibility might be related to different  
446 cell types and culture conditions. Macrophages may potentially have a different mechanism  
447 of MT1-MMP vesicle trafficking from HT1080 cells, and MDA-MB231 cells in different lab  
448 may gain different mechanism. Nevertheless, we have concluded that KIF5B is not involved  
449 in vesicle transport of endogenous MT1-MMP in HT1080 cells.

450 The analysis of the TCGA database revealed that the expression profile of KIF13A  
451 and KIF9 is altered in several cancer types. Amplification is the most common *Kif13a* gene  
452 alteration detected across the TCGA database. KIF13A is reported by the Pathology Atlas  
453 (<https://www.proteinatlas.org/humanproteome/pathology>) (Uhlen et al., 2017) as an  
454 unfavorable prognostic marker for liver cancer patients. As shown in Figure 10, liver cancer  
455 patients with a high expression of KIF13A had a significantly lower survival probability than  
456 those with a low expression. Our data suggest that KIF13A is a crucial player of MT1-MMP  
457 intracellular trafficking pathways and mediate MT1-MMP-dependent invasion of cancer cells.

458 Therefore, a pro-tumorigenic role of *Kif13a* maybe its involvement in MT1-MMP trafficking to  
459 the cell surface. KIF9 is mainly deleted rather than amplified across the TCGA database.  
460 According to the Pathology Atlas, it is a favorable prognostic marker in renal and colorectal  
461 cancers (Figure 10e and 10f). Thus, KIF9 may have an anti-tumorigenic potential for these  
462 two cancer types. These data highlight that KIF13A and KIF9 may have cancer type-specific  
463 roles, at least partly due to their roles in MT1-MMP intracellular trafficking. Chandrasekaran  
464 et al. (Chandrasekaran et al., 2015) used cBioPortal to search for kinesin gene alterations in  
465 TCGA. They reported that the *Kif13a* gene was amplified in more than 10% of patients  
466 diagnosed with serous ovarian adenocarcinoma or urothelial bladder  
467 carcinoma(Chandrasekaran et al., 2015). They also found that 12% of patients with clear  
468 renal carcinoma had a homozygous deletion of the *Kif9* gene(Chandrasekaran et al., 2015).  
469 These values were slightly different from our analysis of the TCGA database. The  
470 discrepancies are likely due to the large number of data added to the database after  
471 publication. Cho *et al.*(Cho et al., 2019) performed an integrated analysis of specific  
472 kinesin's clinical significance, including KIF9, in low-grade glioma and glioblastoma. They  
473 showed that high KIF9 expression is linked to cancer progression and significantly lower  
474 survival probability, especially for patients diagnosed with glioblastoma(Cho et al., 2019).  
475 Thus, the role of KIF9 may be cancer-specific.

476 In conclusion, we have identified KIF3A, KIF13A, and KIF9-v1 as the major KIFs that  
477 traffic MT1-MMP vesicles in HT1080 cells. KIF3A and KIF13A collaborate and transport  
478 MT1-MMP to the leading edge, while KIF9-v1 seems to compete with KIF13A and KIF3A by  
479 trafficking MT1-MMP-containing vesicles to non-leading edge membrane structures. Our  
480 findings revealed novel mechanisms of interplay between different KIFs, which contribute to  
481 the understanding of vesicle transport mechanisms during cancer invasion.

482

## 483 **MATERIALS AND METHODS**

### 484 ***Plasmid constructs***

485 MT1-RFP in pSG5 vector (Stratagene) was generated as described previously (Itoh et al.,  
486 2011). cDNAs encoding human KIF13A, KIF3A, KIF9-v1, KIF9-v2 and KIF1C were amplified  
487 by PCR using a cDNA library from HT-1080 cells as template. The AcGFP was inserted at  
488 the N-terminus of each KIFs with three glycine as linker. The mutants were constructed by  
489 the overlap extension PCR method. KIF13A-GFP (forward primer for AcGFP: 5'-  
490 TAGGAGCTCGGTACCGCCGCCACCATGGTGAGCAAGGGCG-3'; reverse primer: 5'-  
491 CCATTCCACCTCCCTTGTACAGCTATCCATGC-3'; forward chimera primer for AcGFP-  
492 KIF13A: 5'-TAGGAGCTCGGTACCGCCGCCACCATGGTGAGCGCAAGGGCG-3'; reverse  
493 flanking primer: 5'-TAGCCCGGGTCACTTGTACAGCTCATCCATGC-3'). KIF3A-GFP  
494 (forward flanking primer: 5'-  
495 ATACGACTCACTATAGGGCGAATTCGAGCCACCATGGTGAGCAAGGGCGCC-3';  
496 reverse primer: 5'-CGGCATTCCACCTCCCTTGTACTCATCCATGCCGTG-3'; forward  
497 chimera primer for AcGFP-KIF3A: 5'-  
498 TACAAGGGAGGTGGAATGCCGATCGGTAAATCAGA-3'; flanking reverse primer: 5'-  
499 CCTCTTCATCATCATCTTCC-3'), KIF9-v2 (forward flanking primer: 5'-  
500 AATTCGAGCTCGGTACCCAGATCTGCCACCATGGTGAGCAAGGGCG-3'; reverse primer:  
501 5'-CCCATTCCACCTCCCTTGTACAGCTCATCCATGCCG-3'; forward chimera primer for  
502 AcGFP-KIF9-v2: 5'-ACAAGGGAGGTGGAATGGGTAAGGAAAAAGTTC-3'; flanking  
503 reverse primer: 5'-AATAAGATCTGGATCCCCCTATTTTCTATGTGCCTGCTG-3') and  
504 KIF1C-GFP (forward flanking primer: 5'-  
505 AARRCGAGCTCGGTACCGCCGCCACCATGGTGAGCAAGGGCGCC-3'; reverse primer: 5'-  
506 GCCATTCCACCTCCCTTGTACAGCTCATCCATGCCGTG-3'; forward chimera primer for  
507 AcGFP-KIF1C: 5'-TACAAGGGAGGTGGAATGGCTGGTGCCTCGGTCAA-3'; flanking  
508 reverse primer: 5'-AATAAGATCTGGATCCCCCTCACACAGCTGCCCCACTCTC-3'). KIF9-v1-  
509 GFP was generated by restriction enzyme cloning. KIF3A-HaloTag and KIF9-v2-HaloTag  
510 were generated by sub-cloning KIF3A and KIF9-v2 into pHTN HaloTag CMV-neo  
511 (Promega). KIF13A, KIF13A-GFP, KIF9-v1, KIF9-v2, KIF9-v1-GFP, KIF9-v2-GFP, KIF1C,  
512 and KIF1C-GFP were subcloned into pSG5 vector.

513

514 ***Cell culture, transient transfection and siRNA treatment***

515 HT-1080 human fibrosarcoma cells (ECACC) were cultured in Dulbecco's modified Eagle's  
516 medium (DMEM) (Lonza), containing 10% FBS (Gibco), penicillin/ streptomycin (P/S) (PAA).  
517 Rheumatoid arthritis synovial fibroblasts derived from three different patients were cultured  
518 in DMEM supplemented with 20% FBS and P/S (Miller et al., 2009). HT-1080 cells were  
519 transfected with plasmid constructs using Trans-IT2020 (Mirus Bio) according to the  
520 manufacturer's instructions. Gene silencing was performed by transfection of SMARTpool  
521 ON-TARGETplus siRNA (Dharmacon, Thermo Fisher, Waltham, US) using INTERFERin  
522 (Polyplus-transfection) according to the manufacturer's instructions. Non-targeting siRNA  
523 (NT siRNA) was also purchased from Dharmacon. Gene silencing effectiveness was tested  
524 by Western blotting (WB) or RT-PCR. Cells were subjected for the experiments after 72  
525 hours of transfection.

526

527 ***SDS-PAGE and Western blotting***

528 Cell lysates were prepared by directly dissolving in 1xSDS loading buffer containing 0.1% 2-  
529 mercaptoethanol. Cell lysates were subjected to SDS-PAGE and the proteins in the gel were  
530 transferred to a PBDF membrane using Trans-Blot Turbo Transfer System (Bio-Rad). After  
531 probing the membrane with the primary antibodies, the bands were visualised using  
532 fluorescently-labelled secondary antibodies (LI-COR). Membranes were scanned by  
533 Odyssey CLx imaging system (LI-COR). The band intensities were quantified by ImageJ  
534 software (National Institutes of Health). Actin or tubulin bands were used for normalisation.  
535 Mean band intensities were plotted using Prism (GraphPad software, Inc.) and statistical  
536 significance was calculated using either a parametric unpaired T test or a one-way ordinary  
537 ANOVA with Tuckey's multiple comparison test. The following primary antibodies were used:  
538 rabbit anti-MT1-MMP monoclonal antibody (clone EP1264Y, ab51074, abcam), mouse anti-  
539 MT1-MMP monoclonal antibody (clone 222-1D8), rabbit anti-KIF1C polyclonal antibody  
540 (ab72238, abcam), rabbit anti-KIF3A polyclonal antibody (ab11259, abcam), mouse anti-

541 actin monoclonal antibody (clone C4, sc47778, Santa Cruz), mouse anti-tubuline antibody  
542 (clone B-7, sc5286, Santa Cruz). The following secondary antibodies were used: IRDye  
543 680RD goat anti-mouse IgG (H + L) (926-68070, LI-COR), IRDye 800CW goat anti-rabbit  
544 IgG (H + L) (926-32211, LI-COR).

545

#### 546 ***RT-PCR***

547 Total RNA was isolated using the RNAqueous Micro kit (Invitrogen) according to the  
548 manufacturer's instructions. RNA was reversed-transcribed using the High Capacity cDNA  
549 Reverse Transcription kit from AB applied Biosciences (Thermo Fisher). Resulted cDNA was  
550 used as a template for PCR using the Dream Taq Polymerase (Thermo Fisher). GADPH  
551 was used as housekeeping gene. The following primers were used: KIF13A (forward: 5'-  
552 TTTCCAGTAGGAGGAGTC-3'; reverse: 5'-AAGTTGTTGCGGTGAAGG-3'), KIF3A (forward:  
553 5'-TGCAAAGTCAGAGATGGC-3'; reverse: AGCTGCCATTCTCCTATG-3'), KIF9 (forward:  
554 5'-CCCGGACCTTATCAGAGGAAAAG-3'; reverse (v1): 5'-GGTGTCGGGCCTGAGTGG-3';  
555 reverse (v2): 5'-GGATGGGACAAGCTGGGTC-3'), KIF1C (forward: 5'-  
556 TTCCAGCCCAAAAAGCAC-3'; reverse: 5'-CGGACCTTCTCTCATC-3'), KIF5B (forward:  
557 5'-GCTACAAGAGTTAAAAAGAGTGCT-3'; reverse: 5'-TCACACTTGTTTGCCTCCTCCAG-  
558 3'), MT1-MMP (forward: 5'- GGGACCTACGTACCCACACA; reverse: 5'-  
559 TAGCGCTTCCTTCGAACATT-3') AND GADPH (forward: 5'-  
560 TTCACCACCATGGAGAAGGC-3'; reverse: 5'- GGTCCCTCCGATGCCTGC-3'). RT-PCR  
561 gels were quantified by Fiji using the same protocol described above for the quantification of  
562 WB gels. GADPH bands were used for normalisation.

563

#### 564 ***Gelatin film degradation assay***

565 Fluorescently-labelled gelatin coated coverslips were prepared as described  
566 previously (Evans and Itoh, 2007; Itoh et al., 2006). Cells were cultured atop of the gelatin-  
567 coated coverslips for 2-15 hours, depending on the assay, in the presence or absence of  
568 GM6001 (10  $\mu$ M) (Elastin Products Company), TIMP-1 (200 nM), or DX-2400 (200 nM).

569 TIMP-1 was a gift from Prof Gillian Murphy (University of Cambridge), and DX-2400 was a  
570 gift from Dyax Corp. Cells were then fixed in 4% formaldehyde (Sigma Aldrich) in PBS for 15  
571 minutes and stained with DAPI (Sigma-Aldrich). Images were acquired with a Nikon  
572 microscope with using the 10X dry lens (NA = 0.3) on a Nikon TE2000-E microscope  
573 equipped with an ORCA-ER CCD camera (Hamamatsu Photonics) operated by Volocity  
574 Acquisition module software (Improvision). Gelatin film degradation was quantified using Fiji.  
575 Area of degradation was calculated using the gelatin fluorescence image which was  
576 converted to greyscale and thresholded. The threshold was set the same for all the pictures  
577 analysed, in order to have an objective mean of analysis. Area and area fraction were  
578 measured. The DAPI-stained corresponding image was converted to a binary image in order  
579 to count the number of cells in the microscopic field. The degraded area per cell was  
580 calculated as follow:

$$\text{Degraded Area per cell } (\mu\text{m}^2) = \frac{\text{Total Degraded Area}}{\text{Number of Cells}}$$

581 Mean degraded areas were plotted using Prism and statistical significance was calculated  
582 using one-way ordinary ANOVA with Tuckey's multiple comparison test.

583

#### 584 ***Collagen film degradation assay***

585 Collagen film degradation was carried out as described previously (Evans and Itoh,  
586 2007; Itoh et al., 2006). Briefly, PureCol (bovine collagen type-I, Advanced Biomatrix) and  
587 Cellmatrix type I-A collagen (Nitta Gelatin) were mixed in the ratio 1:1. This mixture was  
588 neutralised and diluted to a 2 mg/ml. 12-well multi well plates were coated with 100  $\mu$ l  
589 collagen solution/well and set for gelation. Cells were cultured on the collagen film for 72  
590 hours in the presence or absence of GM6001 (10  $\mu$ M), TIMP-1 (200 nM), or DX-2400 (200  
591 nM). Cells were removed extensively by trypsin/EDTA (Lonza) and the remaining collagen  
592 layer was fixed with 4% formaldehyde in PBS and stained with R-250 Coomassie Brilliant  
593 Blue (Thermo Fisher). Representative images were acquired using the 10X dry lens (NA =  
594 0.3) on the Nikon TE2000-E microscope equipped with an ORCA-ER CCD camera

595 (Hamamatsu Photonics) operated by Volocity Acquisition module software (Improvision,  
596 PerkinElmer). Collagen degradation was quantified using Fiji by measuring the integrated  
597 density of the collagen layer. Mean results were plotted using Prism and statistical  
598 significance was calculated using one-way ordinary ANOVA with Tuckey's multiple  
599 comparison test.

600

### 601 **Zymography**

602 Gelatin zymography was conducted as reported previously (Evans and Itoh, 2007; Itoh et al.,  
603 2006). Enzyme activity was visualised directly on the gels as negative staining bands with  
604 Coomassie Blue. Pro-MMP-2 (P), intermediate MMP-2 (I) and active MMP-2 (A) bands were  
605 quantified using Fiji. The percentage of processed pro-MMP-2 over the total was calculated  
606 as follow:

$$\frac{\text{Area Peaks (I + A)}}{\text{Area Peaks (P + I + A)}} * 100$$

607

### 608 **Cell Surface biotinylation**

609 Surface biotinylation was carried out using Sulfo-NHS-biotin (Thermo Fisher) as described  
610 previously (Itoh et al., 2001). Cells were cultured to confluency, and cell surface proteins  
611 were labelled with sulfo-NHS-biotin (Thermo-Fischer), followed by affinity precipitation of  
612 biotinylated molecules by streptavidin-conjugated Dyna beads (Thermo Fisher). The eluted  
613 samples were subjected to Western Blotting analyses using rabbit monoclonal anti-MT1-  
614 MMP antibody.

615

### 616 **Indirect immunofluorescent staining**

617 Cells cultured atop of un-labelled or fluorescently labelled gelatin were fixed with 4% (v/v)  
618 formaldehyde in PBS for 5 min and blocked with 3% (w/v) BSA, 5% (v/v) goat serum in TBS  
619 (blocking solution) for 1 hour at room temperature (RT). Cells were then incubated with  
620 primary antibodies in blocking solution. The cells were further probed by Alexa488-

621 conjugated goat anti-mouse IgG (Molecular Probes), DyLight650-conjugated goat anti-rabbit  
622 IgG (Thermo Scientific), Alexa568-conjugated Phalloidin (Molecular Probes, Thermo Fisher)  
623 or DAPI. The following primary antibodies were used for staining: rabbit anti-MT1-MMP  
624 monoclonal antibody (clone EP1264Y, abcam), mouse anti-human  $\beta 1$  integrin monoclonal  
625 antibody (clone 12G10, Millipore).

626

#### 627 ***Trans-well invasion assay***

628 Trans-well invasion assay was performed as previously described (Palmisano and Itoh,  
629 2010). Briefly, a 24-well insert with an 8- $\mu$ m-pore membrane Trans-wells (VWR International  
630 Ltd) was coated with 50  $\mu$ l of CellMatrix/PureCol collagen mixture (1:1, 2 mg/ml), incubated  
631 at 37°C for 1 hour to set the collagen and dried overnight at RT. Cells ( $2 \times 10^4$ /well) were  
632 seeded in the upper chamber and further cultured for 18 hours. Lower chamber media  
633 contained 10% FBS while upper chamber media was serum free. Invaded cells were stained  
634 with DAPI, imaged with fluorescence microscopy, and analyzed by Volocity software.

635

#### 636 ***Microcarrier beads invasion assay***

637 Microcarrier beads invasion assay was carried out as described previously  
638 (Palmisano and Itoh, 2010). Cells were attached to gelatin-coated Cytodex 3 microcarrier  
639 beads (VWR) by preparing a cell/bead suspension which was incubated on a shaker for 6  
640 hours at 37°C. Beads coated with cells were suspended in neutralised Cellmatrix collagen  
641 (final concentration 2 mg/ml) and incubated overnight in the presence or absence of  
642 GM6001 (10  $\mu$ M). Invasion was analysed as the distance between a cell nucleus and the  
643 surface of the bead using the line tool of ImageJ. Migrated distances were calculated for  
644 fifty cells per treatment. Mean migrated distances were plotted using Prism and statistical  
645 significance was calculated using one-way ordinary ANOVA with Tuckey's multiple  
646 comparison test.

647

#### 648 ***Wound-healing assay***



649 Ibidi Culture-Inserts (Ibidi) consisting of two reservoirs separated by a 500- $\mu$ m-width  
650 wall was placed in each well of a 24-well plate and six inserts were used for each treatment.  
651 Cells were seeded in the two reservoirs of the inserts and incubated until confluence. After  
652 the inserts were gently removed, cells were further cultured for 6 hours. Pictures were taken  
653 immediately after the inserts were removed and at the 6-hour time point. To measure the  
654 percentage of wound closure, ImageJ was employed. For each condition, the ROI  
655 corresponding to the initial wound-gap (ROI-I) and the one, delimited by the migration front  
656 after 6 hours of incubation (ROI-F), were calculated. The percentage of wound closure was  
657 calculated as follow:

$$\text{Wound Closure (\%)} = \frac{(\text{ROI} - \text{I}) - (\text{ROI} - \text{F})}{\text{ROI} - \text{I}} * 100$$

658 Mean percentages were plotted using Prism and statistical significance was calculated using  
659 one-way ordinary ANOVA with Tuckey's multiple comparison test.

660

### 661 ***Live cell imaging***

662 Cells were transfected with GFP-tagged KIFs, Halo-tagged KIFs and MT1-RFP. After 36  
663 hours they were seeded at a density of  $4 \times 10^3$ /well on gelatin-coated glass-bottomed 8-well  
664 chambers (Ibidi). After 12 hours, live images were acquired by either confocal laser scanning  
665 microscopy or total internal reflection fluorescence (TIRF) microscopy (details specified  
666 below). Both microscopes were equipped with an environmental chamber to maintain  
667 temperature at 37°C and CO<sub>2</sub> at 5%. Time-lapse images were acquired every 3 to 30  
668 seconds, depending on the experiment.

669

### 670 ***Image acquisition***

671 All widefield images were captured on an inverted Nikon TE2000-E widefield microscope  
672 with Volocity Acquisition software (PerkinElmer). These objective lenses were used: 4X  
673 objective lens (Plan Fluor 4X/NA 0.13), 10X objective lens (UPLSAPO 10X/NA 0.30 DIC),  
674 and 20X objective lens (UPLSAPO 20X/NA 0.45). Confocal laser scanning microscopy

675 imaging was performed on a PerkinElmer Spinning Disk Confocal Microscope based on a  
676 Nikon TE 2000-U Eclipse motorized inverted microscope with DIC optics. A 60X objective  
677 lens was used: 60X (Plan Apo 60x/NA 1.40). Volocity software (PerkinElmer, Coventry, UK)  
678 was used for Acquisition. For TIRFM an Olympus microscope in TIRF mode (CellTIRF-4Line  
679 system; Olympus), equipped with an EMCCD camera (Evolve) was used. A 150X objective  
680 lens was used (UPLSAPO 150 X/ NA 1.45).

681

## 682 ***Data analysis***

683 To measure the amount of either  $\beta 1$  integrin and MT1-MMP at the substrate-  
684 attachment side, the corresponding fluorescence intensities (FIs) were measured by ImageJ.  
685 TIRF images were analysed by defining a region of interest (ROI), corresponding to the cell  
686 body (ROI-CB), and a rectangular ROI in the background (ROI-B). FIs were calculated as  
687 follow:

$$FI = FI(ROI - CB) - FI(ROI - B)$$

688 30 cells were analysed for each condition. ROI-B dimension and position was kept the same  
689 throughout the course of the analysis. Mean FIs were plotted using Prism and statistical  
690 significance was calculated using one-way ordinary ANOVA with Tuckey's multiple  
691 comparison test.

692 To measure the overall amount of MT1-MMP on the cell surface of HT-1080 cells,  
693 FIs were analysed by Volocity measurement module software. Extended focus images of  
694 HT-1080 cells stained for cell surface endogenous MT1-MMP, captured by spinning disk  
695 confocal microscope were used. Thirty cells were analysed for each condition. Mean FIs  
696 were plotted using Prism and statistical significance was calculated using one-way ordinary  
697 ANOVA with Tuckey's multiple comparison test.

698 Co-localisation between GFP-tagged KIFs and MT1-RFP was quantified using the  
699 Coloc 2 plugin in Fiji, which calculates Pearson's correlation coefficients (PCCs). This  
700 procedure was used on two-colour channel images of cells cultured on 2D matrices and on  
701 two-colour channel stacks of cells cultured in 3D collagen matrices. Mean PCCs were

702 plotted using Prism and statistical significance was calculated using one-way ordinary  
703 ANOVA with Tuckey's multiple comparison test.

704 Tracking of MT1-RFP-containing vesicles trafficked by GFP-tagged KIFs was  
705 performed using the Track Mate plugin (Tinevez et al., 2017) in Fiji. Vesicles were identified  
706 using the LoG detector and their diameter was estimated at 1.5  $\mu\text{m}$ . Tracking was performed  
707 by Simple LAP Tracker using 2  $\mu\text{m}$  as linking and gap-closing maximum distances. The gap-  
708 closing maximum frame gap was set at 2. Mean velocities and vesicle diameters were  
709 calculated automatically by the plugin. Data were plotted using Prism and statistical  
710 significance was calculated by a parametric unpaired T test or a one-way ordinary ANOVA  
711 with Tuckey's multiple comparison test.

712 To analyse genomic alterations of Kif13a, Kif3a and Kif9 genes in cancer, we  
713 employed cBioPortal (Cerami et al., 2012; Gao et al., 2013) (<https://www.cbioportal.org>). The  
714 Cancer Genome Atlas (TCGA) PanCancer Atlas studies were selected to visualise and  
715 analyse Kif13a, Kif3a and Kif9 gene alterations. The Human Protein Atlas  
716 (<https://www.proteinatlas.org>) was used to check whether Kif13a Kif3a or Kif9 genes were  
717 prognostic markers for specific cancer types.

718

## 719 **ACKNOWLEDGEMENT**

720 We thank Prof Gillian Murphy for providing recombinant human TIMP-1. We thank Dyax  
721 Corp for providing us DX-2400. This work was funded by Cancer Research UK (Ref  
722 C1507/A12015) and DPhil studentship from Kennedy Trust of Rheumatology Research  
723 (KTRR). The Kennedy Institute of Rheumatology Cell Dynamics Platform (M. L. D. and Y. I.)  
724 was supported by KTRR and Wellcome 100262Z/12/Z (for the TIRF microscope). S. B. and  
725 M. L. D. were supported by ERC-2014-AdG 670930.

726

## 727 **REFERENCES**

728 Castro-Castro, A., V. Marchesin, P. Monteiro, C. Lodillinsky, C. Rosse, and P. Chavrier.  
729 2016. Cellular and Molecular Mechanisms of MT1-MMP-Dependent Cancer Cell  
730 Invasion. *Annu Rev Cell Dev Biol.* 32:555-576.

- 731 Cerami, E., J. Gao, U. Dogrusoz, B.E. Gross, S.O. Sumer, B.A. Aksoy, A. Jacobsen, C.J.  
732 Byrne, M.L. Heuer, E. Larsson, Y. Antipin, B. Reva, A.P. Goldberg, C. Sander, and  
733 N. Schultz. 2012. The cBio cancer genomics portal: an open platform for exploring  
734 multidimensional cancer genomics data. *Cancer Discov.* 2:401-404.
- 735 Chan, K.M., H.L. Wong, G. Jin, B. Liu, R. Cao, Y. Cao, K. Lehti, K. Tryggvason, and Z.  
736 Zhou. 2012. MT1-MMP inactivates ADAM9 to regulate FGFR2 signaling and calvarial  
737 osteogenesis. *Dev Cell.* 22:1176-1190.
- 738 Chandrasekaran, G., P. Tatrai, and F. Gergely. 2015. Hitting the brakes: targeting  
739 microtubule motors in cancer. *Br J Cancer.* 113:693-698.
- 740 Cho, S.Y., S. Kim, G. Kim, P. Singh, and D.W. Kim. 2019. Integrative analysis of KIF4A, 9,  
741 18A, and 23 and their clinical significance in low-grade glioma and glioblastoma. *Sci*  
742 *Rep.* 9:4599.
- 743 Cornfine, S., M. Himmel, P. Kopp, K. El Azzouzi, C. Wiesner, M. Kruger, T. Rudel, and S.  
744 Linder. 2011. The kinesin KIF9 and reggie/flotillin proteins regulate matrix  
745 degradation by macrophage podosomes. *Mol Biol Cell.* 22:202-215.
- 746 Devy, L., L. Huang, L. Naa, N. Yanamandra, H. Pieters, N. Frans, E. Chang, Q. Tao, M.  
747 Vanhove, A. Lejeune, R. van Gool, D.J. Sexton, G. Kuang, D. Rank, S. Hogan, C.  
748 Pazmany, Y.L. Ma, S. Schoonbroodt, A.E. Nixon, R.C. Ladner, R. Hoet, P.  
749 Henderikx, C. Tenhoor, S.A. Rabbani, M.L. Valentino, C.R. Wood, and D.T.  
750 Dransfield. 2009. Selective inhibition of matrix metalloproteinase-14 blocks tumor  
751 growth, invasion, and angiogenesis. *Cancer research.* 69:1517-1526.
- 752 Endo, K., T. Takino, H. Miyamori, H. Kinsen, T. Yoshizaki, M. Furukawa, and H. Sato. 2003.  
753 Cleavage of syndecan-1 by membrane type matrix metalloproteinase-1 stimulates  
754 cell migration. *J Biol Chem.* 278:40764-40770.
- 755 Evans, R.D., and Y. Itoh. 2007. Analyses of MT1-MMP activity in cells. *Methods Mol Med.*  
756 135:239-249.
- 757 Ferrari, R., G. Martin, O. Tagit, A. Guichard, A. Cambi, R. Voituriez, S. Vassilopoulos, and P.  
758 Chavrier. 2019. MT1-MMP directs force-producing proteolytic contacts that drive  
759 tumor cell invasion. *Nat Commun.* 10:4886.
- 760 Frittoli, E., A. Palamidessi, A. Disanza, and G. Scita. 2011. Secretory and endo/exocytic  
761 trafficking in invadopodia formation: the MT1-MMP paradigm. *European journal of*  
762 *cell biology.* 90:108-114.
- 763 Gao, J., B.A. Aksoy, U. Dogrusoz, G. Dresdner, B. Gross, S.O. Sumer, Y. Sun, A. Jacobsen,  
764 R. Sinha, E. Larsson, E. Cerami, C. Sander, and N. Schultz. 2013. Integrative  
765 analysis of complex cancer genomics and clinical profiles using the cBioPortal. *Sci*  
766 *Signal.* 6:pl1.
- 767 Gifford, V., and Y. Itoh. 2019. MT1-MMP-dependent cell migration: proteolytic and non-  
768 proteolytic mechanisms. *Biochem Soc Trans.*
- 769 Hirokawa, N. 2000. Stirring up development with the heterotrimeric kinesin KIF3. *Traffic.*  
770 1:29-34.
- 771 Hirokawa, N., Y. Noda, Y. Tanaka, and S. Niwa. 2009. Kinesin superfamily motor proteins  
772 and intracellular transport. *Nat Rev Mol Cell Biol.* 10:682-696.
- 773 Hirokawa, N., and Y. Tanaka. 2015. Kinesin superfamily proteins (KIFs): Various functions  
774 and their relevance for important phenomena in life and diseases. *Exp Cell Res.*  
775 334:16-25.
- 776 Holmbeck, K., P. Bianco, S. Yamada, and H. Birkedal-Hansen. 2004. MT1-MMP: a tethered  
777 collagenase. *J Cell Physiol.* 200:11-19.
- 778 Idzko, M., M. Laut, E. Panther, S. Sorichter, T. Durk, J.W. Fluhr, Y. Herouy, M.  
779 Mockenhaupt, D. Myrtek, P. Elsner, and J. Norgauer. 2004. Lysophosphatidic acid  
780 induces chemotaxis, oxygen radical production, CD11b up-regulation, Ca<sup>2+</sup>  
781 mobilization, and actin reorganization in human eosinophils via pertussis toxin-  
782 sensitive G proteins. *J Immunol.* 172:4480-4485.
- 783 Infante, E., A. Castagnino, R. Ferrari, P. Monteiro, S. Aguera-Gonzalez, P. Paul-Gilloteaux,  
784 M.J. Domingues, P. Maiuri, M. Raab, C.M. Shanahan, A. Baffet, M. Piel, E.R.  
785 Gomes, and P. Chavrier. 2018. LINC complex-Lis1 interplay controls MT1-MMP

- 786 matrix digest-on-demand response for confined tumor cell migration. *Nat Commun.*  
787 9:2443.
- 788 Itoh, Y. 2015. Membrane-type matrix metalloproteinases: Their functions and regulations.  
789 *Matrix Biol.* 44-46:207-223.
- 790 Itoh, Y., N. Ito, H. Nagase, R.D. Evans, S.A. Bird, and M. Seiki. 2006. Cell surface  
791 collagenolysis requires homodimerization of the membrane-bound collagenase MT1-  
792 MMP. *Mol Biol Cell.* 17:5390-5399.
- 793 Itoh, Y., R. Palmisano, N. Anilkumar, H. Nagase, A. Miyawaki, and M. Seiki. 2011.  
794 Dimerization of MT1-MMP during cellular invasion detected by fluorescence  
795 resonance energy transfer. *Biochem J.* 440:319-326.
- 796 Itoh, Y., A. Takamura, N. Ito, Y. Maru, H. Sato, N. Suenaga, T. Aoki, and M. Seiki. 2001.  
797 Homophilic complex formation of MT1-MMP facilitates proMMP-2 activation on the  
798 cell surface and promotes tumor cell invasion. *EMBO J.* 20:4782-4793.
- 799 Jiang, A., K. Lehti, X. Wang, S.J. Weiss, J. Keski-Oja, and D. Pei. 2001. Regulation of  
800 membrane-type matrix metalloproteinase 1 activity by dynamin-mediated  
801 endocytosis. *Proc Natl Acad Sci U S A.* 98:13693-13698.
- 802 Jin, G., F. Zhang, K.M. Chan, H.L. Xavier Wong, B. Liu, K.S. Cheah, X. Liu, C. Mauch, D.  
803 Liu, and Z. Zhou. 2011. MT1-MMP cleaves Dll1 to negatively regulate Notch  
804 signalling to maintain normal B-cell development. *EMBO J.* 30:2281-2293.
- 805 Kajita, M., Y. Itoh, T. Chiba, H. Mori, A. Okada, H. Kinoh, and M. Seiki. 2001. Membrane-  
806 type 1 matrix metalloproteinase cleaves CD44 and promotes cell migration. *J Cell*  
807 *Biol.* 153:893-904.
- 808 Kaneko, K., R.O. Williams, D.T. Dransfield, A.E. Nixon, A. Sandison, and Y. Itoh. 2016.  
809 Selective Inhibition of Membrane Type 1 Matrix Metalloproteinase Abrogates  
810 Progression of Experimental Inflammatory Arthritis: Synergy With Tumor Necrosis  
811 Factor Blockade. *Arthritis Rheumatol.* 68:521-531.
- 812 Koshikawa, N., D. Hoshino, H. Taniguchi, T. Minegishi, T. Tomari, S.O. Nam, M. Aoki, T.  
813 Sueta, T. Nakagawa, S. Miyamoto, K. Nabeshima, A.M. Weaver, and M. Seiki. 2015.  
814 Proteolysis of EphA2 Converts It from a Tumor Suppressor to an Oncoprotein.  
815 *Cancer research.* 75:3327-3339.
- 816 Le Borgne, R., and B. Hoflack. 1998. Protein transport from the secretory to the endocytic  
817 pathway in mammalian cells. *Biochimica et biophysica acta.* 1404:195-209.
- 818 Lehti, K., J. Lohi, M.M. Juntunen, D. Pei, and J. Keski-Oja. 2002. Oligomerization through  
819 hemopexin and cytoplasmic domains regulates the activity and turnover of  
820 membrane-type 1 matrix metalloproteinase. *J Biol Chem.* 277:8440-8448.
- 821 Majkowska, I., Y. Shitomi, N. Ito, N.S. Gray, and Y. Itoh. 2017. Discoidin domain receptor 2  
822 mediates collagen-induced activation of membrane-type 1 matrix metalloproteinase  
823 in human fibroblasts. *J Biol Chem.* 292:6633-6643.
- 824 Marchesin, V., A. Castro-Castro, C. Lodillinsky, A. Castagnino, J. Cyrta, H. Bonsang-Kitzis,  
825 L. Fuhrmann, M. Irondelle, E. Infante, G. Montagnac, F. Reyat, A. Vincent-Salomon,  
826 and P. Chavrier. 2015. ARF6-JIP3/4 regulate endosomal tubules for MT1-MMP  
827 exocytosis in cancer invasion. *J Cell Biol.* 211:339-358.
- 828 Miller, M.C., H.B. Manning, A. Jain, L. Troeberg, J. Dudhia, D. Essex, A. Sandison, M. Seiki,  
829 J. Nanchahal, H. Nagase, and Y. Itoh. 2009. Membrane type 1 matrix  
830 metalloproteinase is a crucial promoter of synovial invasion in human rheumatoid  
831 arthritis. *Arthritis Rheum.* 60:686-697.
- 832 Nakagawa, T., M. Setou, D. Seog, K. Ogasawara, N. Dohmae, K. Takio, and N. Hirokawa.  
833 2000. A novel motor, KIF13A, transports mannose-6-phosphate receptor to plasma  
834 membrane through direct interaction with AP-1 complex. *Cell.* 103:569-581.
- 835 Ohuchi, E., K. Imai, Y. Fujii, H. Sato, M. Seiki, and Y. Okada. 1997. Membrane type 1 matrix  
836 metalloproteinase digests interstitial collagens and other extracellular matrix  
837 macromolecules. *J Biol Chem.* 272:2446-2451.
- 838 Palmisano, R., and Y. Itoh. 2010. Analysis of MMP-dependent cell migration and invasion.  
839 *Methods Mol Biol.* 622:379-392.



- 840 Pedersen, N.M., E.M. Wenzel, L. Wang, S. Antoine, P. Chavrier, H. Stenmark, and C.  
841 Raiborg. 2020. Protrudin-mediated ER-endosome contact sites promote MT1-MMP  
842 exocytosis and cell invasion. *J Cell Biol.* 219.
- 843 Perez Bay, A.E., R. Schreiner, F. Mazzoni, J.M. Carvajal-Gonzalez, D. Gravotta, E. Perret,  
844 G. Lehmann Mantaras, Y.S. Zhu, and E.J. Rodriguez-Boulan. 2013. The kinesin  
845 KIF16B mediates apical transcytosis of transferrin receptor in AP-1B-deficient  
846 epithelia. *EMBO J.* 32:2125-2139.
- 847 Planchon, D., E. Rios Morris, M. Genest, F. Comunale, S. Vacher, I. Bieche, E.V. Denisov,  
848 L.A. Tashireva, V.M. Perelmuter, S. Linder, P. Chavrier, S. Bodin, and C. Gauthier-  
849 Rouviere. 2018. MT1-MMP targeting to endolysosomes is mediated by upregulation  
850 of flotillins. *J Cell Sci.* 131.
- 851 Poincloux, R., F. Lizárraga, and P. Chavrier. 2009. Matrix invasion by tumour cells: a focus  
852 on MT1-MMP trafficking to invadopodia. *J Cell Sci.* 122:3015-3024.
- 853 Remacle, A., G. Murphy, and C. Roghi. 2003. Membrane type 1-matrix metalloproteinase  
854 (MT1-MMP) is internalised by two different pathways and is recycled to the cell  
855 surface. *J Cell Sci.* 116:3905-3916.
- 856 Rozanov, D.V., E. Hahn-Dantona, D.K. Strickland, and A.Y. Strongin. 2004. The low density  
857 lipoprotein receptor-related protein LRP is regulated by membrane type-1 matrix  
858 metalloproteinase (MT1-MMP) proteolysis in malignant cells. *J Biol Chem.* 279:4260-  
859 4268.
- 860 Sabeh, F., I. Ota, K. Holmbeck, H. Birkedal-Hansen, P. Soloway, M. Balbin, C. Lopez-Otin,  
861 S. Shapiro, M. Inada, S. Krane, E. Allen, D. Chung, and S.J. Weiss. 2004. Tumor cell  
862 traffic through the extracellular matrix is controlled by the membrane-anchored  
863 collagenase MT1-MMP. *J Cell Biol.* 167:769-781.
- 864 Sabeh, F., R. Shimizu-Hirota, and S.J. Weiss. 2009. Protease-dependent versus -  
865 independent cancer cell invasion programs: three-dimensional amoeboid movement  
866 revisited. *J Cell Biol.* 185:11-19.
- 867 Sato, H., T. Takino, Y. Okada, J. Cao, A. Shinagawa, E. Yamamoto, and M. Seiki. 1994. A  
868 matrix metalloproteinase expressed on the surface of invasive tumour cells. *Nature.*  
869 370:61-65.
- 870 Seiki, M. 2003. Membrane-type 1 matrix metalloproteinase: a key enzyme for tumor  
871 invasion. *Cancer Lett.* 194:1-11.
- 872 Shakya, S., P. Sharma, A.M. Bhatt, R.A. Jani, C. Delevoye, and S.R. Setty. 2018. Rab22A  
873 recruits BLOC-1 and BLOC-2 to promote the biogenesis of recycling endosomes.  
874 *EMBO Rep.* 19.
- 875 Sithu, S.D., W.R. English, P. Olson, D. Krubasik, A.H. Baker, G. Murphy, and S.E. D'Souza.  
876 2007. Membrane-type 1-matrix metalloproteinase regulates intracellular adhesion  
877 molecule-1 (ICAM-1)-mediated monocyte transmigration. *J Biol Chem.* 282:25010-  
878 25019.
- 879 Stanton, H., J. Gavrilovic, S.J. Atkinson, M.P. d'Ortho, K.M. Yamada, L. Zardi, and G.  
880 Murphy. 1998. The activation of ProMMP-2 (gelatinase A) by HT1080 fibrosarcoma  
881 cells is promoted by culture on a fibronectin substrate and is concomitant with an  
882 increase in processing of MT1-MMP (MMP-14) to a 45 kDa form. *J Cell Sci.*  
883 111:2789-2798.
- 884 Sugiyama, N., E. Gucciardo, O. Tatti, M. Varjosalo, M. Hyytiainen, M. Gstaiger, and K. Lehti.  
885 2013. EphA2 cleavage by MT1-MMP triggers single cancer cell invasion via  
886 homotypic cell repulsion. *J Cell Biol.* 201:467-484.
- 887 Taniwaki, K., H. Fukamachi, K. Komori, Y. Ohtake, T. Nonaka, T. Sakamoto, T. Shiomi, Y.  
888 Okada, T. Itoh, S. Itohara, M. Seiki, and I. Yana. 2007. Stroma-derived matrix  
889 metalloproteinase (MMP)-2 promotes membrane type 1-MMP-dependent tumor  
890 growth in mice. *Cancer research.* 67:4311-4319.
- 891 Teng, J., T. Rai, Y. Tanaka, Y. Takei, T. Nakata, M. Hirasawa, A.B. Kulkarni, and N.  
892 Hirokawa. 2005. The KIF3 motor transports N-cadherin and organizes the developing  
893 neuroepithelium. *Nat Cell Biol.* 7:474-482.

- 894 Thapa, N., and R.A. Anderson. 2017. PLD and PA Take MT1-MMP for a Metastatic Ride.  
895 *Dev Cell.* 43:117-119.
- 896 Tinevez, J.Y., N. Perry, J. Schindelin, G.M. Hoopes, G.D. Reynolds, E. Laplantine, S.Y.  
897 Bednarek, S.L. Shorte, and K.W. Eliceiri. 2017. TrackMate: An open and extensible  
898 platform for single-particle tracking. *Methods.* 115:80-90.
- 899 Uhlen, M., C. Zhang, S. Lee, E. Sjostedt, L. Fagerberg, G. Bidkhori, R. Benfeitas, M. Arif, Z.  
900 Liu, F. Edfors, K. Sanli, K. von Feilitzen, P. Oksvold, E. Lundberg, S. Hober, P.  
901 Nilsson, J. Mattsson, J.M. Schwenk, H. Brunnstrom, B. Glimelius, T. Sjoblom, P.H.  
902 Edqvist, D. Djureinovic, P. Micke, C. Lindskog, A. Mardinoglu, and F. Ponten. 2017.  
903 A pathology atlas of the human cancer transcriptome. *Science.* 357.
- 904 Wang, Y., and M.A. McNiven. 2012. Invasive matrix degradation at focal adhesions occurs  
905 via protease recruitment by a FAK-p130Cas complex. *J Cell Biol.* 196:375-385.
- 906 Wang, Z., F. Zhang, J. He, P. Wu, L.W.R. Tay, M. Cai, W. Nian, Y. Weng, L. Qin, J.T.  
907 Chang, L.B. McIntire, G. Di Paolo, J. Xu, J. Peng, and G. Du. 2017. Binding of PLD2-  
908 Generated Phosphatidic Acid to KIF5B Promotes MT1-MMP Surface Trafficking and  
909 Lung Metastasis of Mouse Breast Cancer Cells. *Dev Cell.* 43:186-197 e187.
- 910 Wiesner, C., J. Faix, M. Himmel, F. Bentzien, and S. Linder. 2010. KIF5B and KIF3A/KIF3B  
911 kinesins drive MT1-MMP surface exposure, CD44 shedding, and extracellular matrix  
912 degradation in primary macrophages. *Blood.* 116:1559-1569.
- 913 Wolf, K., M. Te Lindert, M. Krause, S. Alexander, J. Te Riet, A.L. Willis, R.M. Hoffman, C.G.  
914 Figdor, S.J. Weiss, and P. Friedl. 2013. Physical limits of cell migration: control by  
915 ECM space and nuclear deformation and tuning by proteolysis and traction force. *J*  
916 *Cell Biol.* 201:1069-1084.
- 917 Wolf, K., Y.I. Wu, Y. Liu, J. Geiger, E. Tam, C. Overall, M.S. Stack, and P. Friedl. 2007.  
918 Multi-step pericellular proteolysis controls the transition from individual to collective  
919 cancer cell invasion. *Nat Cell Biol.* 9:893-904.
- 920 Woskowicz, A.M., S.A. Weaver, Y. Shitomi, N. Ito, and Y. Itoh. 2013. MT-LOOP-dependent  
921 localization of membrane type I matrix metalloproteinase (MT1-MMP) to the cell  
922 adhesion complexes promotes cancer cell invasion. *J Biol Chem.* 288:35126-35137.  
923
- 924

## 925 FIGURE LEGENDS

### 926 **Figure 1. Knockdown of KIF13A, KIF3A, KIF9 and KIF1C alters MT1-MMP-mediated** 927 **cell functions on the cell surface.**

928 **a.** HT-1080 cells were transfected with the indicated siRNAs and subjected to gelatin film  
929 degradation assay in the presence or absence of GM6001 (10  $\mu$ M). Scale bars are 130  $\mu$ m.  
930 Quantification of the degradation area ( $\mu$ m<sup>2</sup>) per cell in HT-1080 cells transfected with the  
931 indicated siRNAs was shown as a graph (right panel). Data are presented as the mean of  
932 fifteen independent microscopic fields of view and are representative of five independent  
933 experiments. One-way ordinary Anova with Tuckey's multiple comparisons test. Data are  
934 shown as mean  $\pm$  SD. \*\*\*\* $P$  < 0.0001.

935 **b.** HT-1080 cells were transfected with the indicated siRNAs and subjected to collagen film  
936 degradation assay in the presence or absence of GM6001 (10  $\mu$ M). Scale bars are 130  $\mu$ m.  
937 Quantification of the integrated density of the collagen layer in HT-1080 cells transfected  
938 with the indicated siRNAs was shown as a graph (right panel). Data are presented as the  
939 mean of eight independent microscopic fields of view and are representative of five  
940 independent experiments. One-way ordinary Anova with Tuckey's multiple comparisons test.  
941 Data are shown as mean  $\pm$  SD. \*\*\*\* $P$  < 0.0001; \* $P$  < 0.05.

942 **c.** HT-1080 cells transfected with the indicated siRNAs were cultivated in the presence or  
943 absence of collagen I (100  $\mu$ g/ml) for 24 h. Culture media were analysed by zymography  
944 (Zymo) for proMMP-2 activation. Cell lysates were subjected to Western blotting using  
945 antibodies for MT1-MMP Hpx domain and tubulin. Arrows point bands of interest. ProMMP-  
946 2, 68 kDa proMMP-2; Intermediate, 65 kDa intermediate form; Active form, 62 kDa active  
947 MMP-2. Quantification of the percentage of MMP-2 processed forms over the total was  
948 shown as a graph (middle panel). Top panel shows processed MMP-2 without collagen  
949 stimulation, and the bottom panel shows the MMP-2 activation upon collagen stimulation.  
950 Quantification of the 45 kDa MT1-MMP processed forms (%) upon collagen stimulation was  
951 shown as a graph (right panel). Data are calculated from five independent experiments.  
952 One-way ordinary Anova with Tuckey's multiple comparisons test. Data are presented as  
953 mean of five blots representative of five independent experiments. One-way ordinary Anova  
954 with Tuckey's multiple comparisons test. Data are shown as mean  $\pm$  SD. \*\*\*\* $P$  < 0.0001; \*\* $P$   
955 < 0.01. n.s., non-significant.

956 **d.** Efficiency of KIF knockdown was assessed by Western blotting for KIF1C and KIF3A and  
957 by RT-PCR for KIF13A, KIF9v1-v3. Effect of KIF knockdown on MT1-MMP mRNA level was  
958 also examined. Quantification data were shown as a graph. Western blot band intensities  
959 were normalized with Actin band intensities and mRNA normalized with the one for GAPDH.



960 **e.** HT1080 cells transfected with siRNA for KIF5B were subjected to gelatin film degradation  
961 assay. Top panel shows representative images from each treatment as indicated. Bottom  
962 left panel shows a quantitative data as degradation area per cells. Data is shown as mean  $\pm$   
963 SD (n=12). n.s., non-significant. Bottom right panel shows a quantitative data of KIF5B  
964 measured by Western blot. Data are presented as mean of three blots representative of  
965 three independent experiments.  
966

967 **Figure 2. Knockdown of KIF13A, KIF3A, KIF9 and KIF1C modifies MT1-MMP**  
968 **localisation at the substrate-attachment side.**

969 **a.** HT-1080 cells were transfected with the indicated siRNAs subjected to cell surface  
970 biotinylation. Proteins eluted from the streptavidin beads were analysed by Western blot  
971 using anti-Loop MT1-MMP antibody. Whole cell lysates were analysed by Western blot  
972 using 1D8 anti-MT1-MMP and anti-actin antibodies. Arrows point bands of interest.  
973 Quantification of the cell surface MT1-MMP in the left panel is shown as a graph (right  
974 panel). MT1-MMP band intensities were normalized by actin band. Data are presented as  
975 mean  $\pm$  SD. (n=5)

976 **b.** HT1080 cells transfected with siRNAs targeting KIFs were subjected to indirect  
977 immunofluorescent staining with anti-MT1-MMP antibody without permeabilization and  
978 imaged with confocal microscopy. Representative extended focus images of three  
979 independent experiments were shown for MT1-MMP (red) and actin (yellow) (top panel).  
980 Quantitative data were shown as a graph (bottom panel). Fluorescent intensity of extended  
981 focus image per cell was measured and the data are presented as mean  $\pm$  SD.

982 **c.** HT-1080 cells transfected with siRNAs targeting the KIFs were stained with anti-MT1-  
983 MMP antibody without permeabilization (red) and imaged by TIRF microscopy.  
984 Representative images of three independent experiments are shown (left panel). Scale bars  
985 are 10  $\mu$ m. Quantitative data of the fluorescent intensities at the substrate-attachment side  
986 were shown as a graph (right panel). Data are presented as mean  $\pm$  SD. (n=30). \*\*\*\* $P$  <  
987 0.0001; \*\* $P$  < 0.01; n.s., non-significant.

988 **d.** HT-1080 cells were transfected with siRNAs targeting the selected KIFs. After 72 hours,  
989 cells were stained with anti- $\beta$ 1 integrin (green) antibody without permeabilisation and imaged  
990 by TIRF microscopy. Representative images of three independent experiments are shown  
991 (top panel). Scale bars are 10  $\mu$ m. Quantification of  $\beta$ 1 integrin expression at the substrate  
992 attachment side in HT-1080 cells were shown as a graph (bottom panel). Data are  
993 presented as mean  $\pm$  SD. (n=30).  
994

995 **Figure 3. The knockdown of KIF13A, KIF3A, KIF9 and KIF1C diminishes MT1-MMP-**  
996 **dependent cell migration in 3D collagen.**

997 **a.** HT1080 cells transfected with siRNA indicated were subjected to the same invasion assay  
998 and data shown as a graph (bottom right panel). Data are presented as mean of the number  
999 of cells migrated through six trans-wells for each treatment and are representative of three  
1000 independent experiments. \*\*\*\*  $P < 0.0001$ , \*\*  $P < 0.001$ , n.s., non-significant.

1001 **b.** HT1080 cells were transfected with siRNAs targeting the selected KIFs and subjected to  
1002 bead invasion assay in the presence or absence of GM6001 (10  $\mu$ M). A representative  
1003 image of cells migrating from the surface of the bead into collagen type-I matrix (2mg/ml) is  
1004 shown (top panel). Scale bar, 130  $\mu$ m. Data are presented as mean of the distance migrated  
1005 by one hundred cells for each treatment. Error bars SD, \*\*\*\*  $P < 0.0001$ , n.s., non-  
1006 significant.

1007 **c.** HT1080 cells were transfected with siRNAs targeting the selected KIFs and subjected to  
1008 wound healing assay on plastic. Images of 0h and 6h time points are shown. Images are  
1009 representative of three independent experiments. Red lines highlight the migration front.  
1010 Scale bar, 200  $\mu$ m. Quantification of wound healing assay data were shown as a graph  
1011 (bottom panel). Data are presented as mean of the percentage of wound closure relative to  
1012 the initial gap area. \*  $P < 0.019$ .

1013

1014 **Figure 4. MT1-RFP and KIF-GFP co-localisation in HT-1080 cells cultured on gelatin-**  
1015 **coated cover glass and within 3D collagen matrix.**

1016 **a, b, c, d, e.** HT-1080 cells transfected with GFP-tagged KIFs (indicated, green) and MT1-  
1017 RFP (red) were cultured on gelatin-coated cover glass. Extended focus representative  
1018 images are shown. White boxes enclose enlarged areas for perinuclear region and orange  
1019 boxes for periphery region. Scale bars indicate 10  $\mu$ m.

1020 **f.** Quantification of co-localisation between GFP-tagged KIFs and MT1-RFP. Data are  
1021 presented as the mean of 20 PCC calculated for 20 different cells per treatment and are  
1022 representative of three independent experiments. One-way ordinary Anova with Tuckey's  
1023 multiple comparisons test. Data are shown as mean  $\pm$  SD. \*\*\*\*  $P < 0.0001$ ; \*  $P < 0.05$ ; \*\*  $P <$   
1024 0.01; n.s., non-significant.

1025 **g, h, i, j, k.** HT-1080 cells transfected with GFP-tagged KIFs (green) and MT1-RFP (red)  
1026 were cultured within 3D collagen gel and imaged by confocal microscopy. Extended focus  
1027 representative images and the corresponding orthogonal views are shown. White boxes  
1028 enclose enlarged areas. Scale bars are 25  $\mu$ m.

1029 **l.** Quantification of co-localisation between GFP-tagged KIFs and MT1-RFP. Data are  
1030 presented as the mean of five PCCs calculated for five different cells per treatment and are  
1031 representative of three independent experiments. One-way ordinary Anova with Tuckey's

1032 multiple comparisons test. Data are presented as mean  $\pm$  SD; \*\* $P < 0.01$ ; \*\*\* $P < 0.001$ ; \*\*\*\* $P$   
1033  $< 0.0001$ ; n.s., non-significant.

1034

1035

1036 **Figure 5. MT1-RFP was co-trafficked with KIF13A-GFP and KIF3A-GFP**

1037 **a, b.** HT-1080 cells were transfected with KIF13A-GFP (green) and MT1-RFP (red) and they  
1038 were subjected to live cell imaging by confocal microscopy. Representative image time  
1039 sequences are shown. White arrows point vesicles of interest. Scale bars are 22  $\mu$ m.

1040 **c.** Quantification of mean velocity of vesicles of interest at the leading edge and nuclear  
1041 area. Data are representative of five independent experiments and are calculated for 47 and  
1042 44 trajectories for the cell edge and the peri-nuclear area respectively. Unpaired T test with  
1043 Welch's correction. Data are shown as mean  $\pm$  SD. n.s., non-significant.

1044 **d.** Quantification of vesicle diameter at the cell edge and peri-nuclear area. Data are  
1045 representative of five independent experiments and are calculated for 129 vesicles for the  
1046 leading edge and the peri-nuclear area. Data are shown as mean  $\pm$  SD. \*\*\*  $P < 0.001$ .

1047 **e, f.** HT-1080 cells transfected with KIF13A-GFP (green) and MT1-RFP (red) were subjected  
1048 to live cell imaging by TIRF microscopy. Representative image time sequences are shown.  
1049 White arrows point vesicles of interest. IRM, internal reflection microscopy. Scale bar is 10  
1050  $\mu$ m.

1051 **g, h.** HT-1080 cells transfected with KIF3A-GFP (green) and MT1-RFP (red) and they were  
1052 subjected to live cell imaging by confocal microscopy. Representative image time sequences  
1053 are shown. White arrows point vesicles of interest. Scale bars are 22  $\mu$ m.

1054 **i.** Quantification of mean velocity of vesicles of interest with linear or oscillatory trajectories.  
1055 Data are representative of five independent experiments and are calculated for 26 and 24  
1056 linear and oscillatory trajectories respectively. Unpaired T test with Welch's correction. Data  
1057 are shown as mean  $\pm$  SD. n.s., non-significant.

1058 **j.** Quantification of vesicle diameter. Data are representative of five independent  
1059 experiments and are calculated for 129 vesicles for each group. Unpaired T test with  
1060 Welch's correction was used. Data are shown as mean  $\pm$  SD. n.s., non-significant.

1061

1062 **Figure 6. Time lapse imaging of cells expressing MT1-RFP, KIF9-v1-GFP, KIF9-v2-**  
1063 **GFP, and KIF1C-GFP.**

1064 **a.** HT-1080 cells transfected with KIF9-v1-GFP (green) and MT1-RFP (red) were subjected  
1065 to live cell imaging by confocal microscopy. Representative image sequence is shown.  
1066 White arrows point vesicles of interest. Scale bar is 22  $\mu$ m.

1067 **b.** HT-1080 cells were transfected with KIF9-v2-GFP (green) and MT1-RFP (red) and they  
1068 were subjected to live cell imaging by confocal microscopy. Representative image time  
1069 sequence is shown. Scale bars are 22  $\mu\text{m}$ .

1070 **c.** HT-1080 cells were transfected with KIF1C-GFP (green) and MT1-RFP (red) and they  
1071 were subjected to live cell imaging by confocal microscopy. Representative image time  
1072 sequences are shown. White arrows point trailing edges. Scale bars are 22  $\mu\text{m}$ .

1073

1074 **Figure 7. KIF13A and KIF3A transport MT1-MMP-containing vesicles.**

1075 **a.** HT-1080 cells were transfected with siRNAs targeting the selected KIFs and subjected to  
1076 gelatin film degradation assay in the presence or absence of GM6001 (10  $\mu\text{M}$ ). Scale bars  
1077 are 130  $\mu\text{m}$ .

1078 **b.** Quantification of the degradation area ( $\mu\text{m}^2$ ) per cell in HT1080 cells transfected with the  
1079 specified siRNAs. Data are presented as mean of 10 independent microscopic fields of view  
1080 and are representative of three independent experiments. One-way ordinary Anova with  
1081 Tuckey's multiple comparisons test. Data are shown as mean  $\pm$  SD. \*\*\*\* $P < 0.0001$ ; \*\*\* $P <$   
1082  $0.001$ ; \*\* $P < 0.01$ ; n.s., non-significant.

1083 **c.** Efficiency of KIF knockdown was assessed by one-step RT-PCR. Quantification of  
1084 KIF13A and KIF3A mRNA fold changes relative to GAPDH mRNA. The data are  
1085 representative of three independent experiments.

1086 **d, e, f.** HT-1080 cells were transfected with KIF13A-GFP (green), KIF3A-GFP (white) and  
1087 MT1-RFP (red) and they were subjected to live cell imaging by confocal microscopy.  
1088 Representative image time sequences are shown. Arrows point vesicles of interest. Scale  
1089 bars are 22  $\mu\text{m}$ .

1090 **g.** Quantification of mean velocities of MT1-RFP-containing vesicles transported by KIF13A-  
1091 GFP at the cell edge and nuclear area. Data are representative of three independent  
1092 experiments and are calculated for 32 and seven trajectories for the cell edge and the  
1093 nuclear area respectively. Unpaired T test with Welch's correction. Data are shown as mean  
1094  $\pm$  SD. \*\* $P < 0.01$ ; n.s., non-significant.

1095 **h.** Quantification of mean velocities of MT1-RFP-containing vesicles transported by KIF3A-  
1096 GFP with linear or oscillatory trajectories. Data are representative of three independent  
1097 experiments and are calculated for 10 linear and 11 oscillatory trajectories. Unpaired T test  
1098 with Welch's correction. Data are shown as mean  $\pm$  SD. \*\* $P < 0.01$ , n.s., non-significant.

1099

1100

1101 **Figure 8. Increased gelatin film degradation upon KIF9 knockdown is due to increased**  
1102 **KIF13A and KIF3A-dependent vesicle transport of MT1-MMP**

1103 a. HT1080 cells were transfected with siRNA for KIF13A, KIF3A and/or KIF9 and subjected  
1104 to gelatin film degradation assay. Cells were counterstained with DAPI (lower panels). Scale  
1105 bar is 130 $\mu$ m.  
1106 b. Quantification of the degradation area ( $\mu$ m<sup>2</sup>) per cell. Data are presented as the mean of  
1107 ten independent microscopic fields of view and are representative of three independent  
1108 experiments. *P* values were calculated by Student T test. Data are shown as mean  $\pm$  S.D.  
1109 \*\*\*\**p*>0.0001; \**p*>0.05.  
1110 c. Efficiency of KIF knockdown by one-step RT-PCR. Quantification of KIF13A, KIF3A and  
1111 KIF9-v1 mRNA fold changes relative to GAPDH. The data are representative of three  
1112 independent experiments.  
1113

1114 **Figure 9. Effect of KIF knockdown on MT1-MMP activity in RASF and MDA-MB-231**  
1115 **cells.**

1116 a. RASFs were transfected with siRNAs targeting the selected KIFs and subjected to  
1117 collagen film degradation assay in the presence or absence of GM6001 (10  $\mu$ M). Scale bars,  
1118 130  $\mu$ m.  
1119 b. Quantitative data of the integrated density of the collagen layer in RASFs transfected with  
1120 the specified siRNAs. Data are presented as mean of eight independent microscopic fields  
1121 of view and are representative of five independent experiments. One-way ordinary Anova  
1122 with Tuckey's multiple comparisons test. Data are shown as mean  $\pm$  SD. \*\*\*\**P* < 0.0001, \*\**P*  
1123 < 0.01, \**P* < 0.05, n.s., non-significant.  
1124 c. Efficiency of KIF knockdown assessed by RT-PCR in RASFs were shown as graphs. The  
1125 data are representative of three independent experiments.  
1126 d. MDA-MB-231 cells were transfected with siRNAs targeting the indicated KIFs and  
1127 subjected to gelatin film degradation assay in the presence or absence of GM6001 (10  $\mu$ M).  
1128 Scale bars are 130  $\mu$ m. e. Quantitative data of the degradation area ( $\mu$ m<sup>2</sup>) per cell were  
1129 shown as a graph. Data are presented as the mean of fifteen independent microscopic fields  
1130 of view and are representative of five independent experiments. *P* values were calculated by  
1131 One-way ordinary Anova with Tuckey's multiple comparisons test. Data are shown as mean  
1132  $\pm$  SD; \*\*\*\**P* < 0.0001. n.s., non-significant.  
1133 f. Efficiency of knockdown for KIF13A and KIF9 were assessed by RT-PCR. The level of  
1134 mRNAs relative to GAPDH mRNA were shown as graphs. Efficiency of KIF3A and KIF1C  
1135 knockdown were assessed by Western blot. Cell lysates were analysed by Western blotting.  
1136 Quantification of the intensity of KIF3A, KIF1C and KIF5B protein bands relative to actin  
1137 were shown as graphs. The data are representative of three independent experiments.  
1138

1139 **Figure 10. Genomic analysis of KIF13A and KIF9.**

1140 **a.** The oncoprints of KIF13A and KIF9 were identified. Genetic alterations of KIF13A and  
1141 KIF9. The columns represent patients from studies within TCGA and the rows gene  
1142 alterations like amplification and deep deletion.

1143 **b.** Genetic alterations of KIF13A summarised according to the study type. Amplifications are  
1144 shown in red and deep deletions are blue.

1145 **c.** Genetic alterations of KIF9 summarised according to the study type. Amplifications are  
1146 shown in red and deep deletions are blue.

1147 **d.** Kaplan-Meier survival analysis of liver cancer patients with low or high mRNA expression  
1148 of KIF13A. *P* value was obtained with log-rank test.

1149 **e.** Kaplan-Meier survival analysis of renal cancer patients with low or high mRNA expression  
1150 of KIF9. *P* value was obtained with log-rank test. **f.** Kaplan-Meier survival analysis of  
1151 colorectal cancer patients with low or high mRNA expression of KIF9. *P* value was obtained  
1152 with log-rank test.

1153

1154

1155



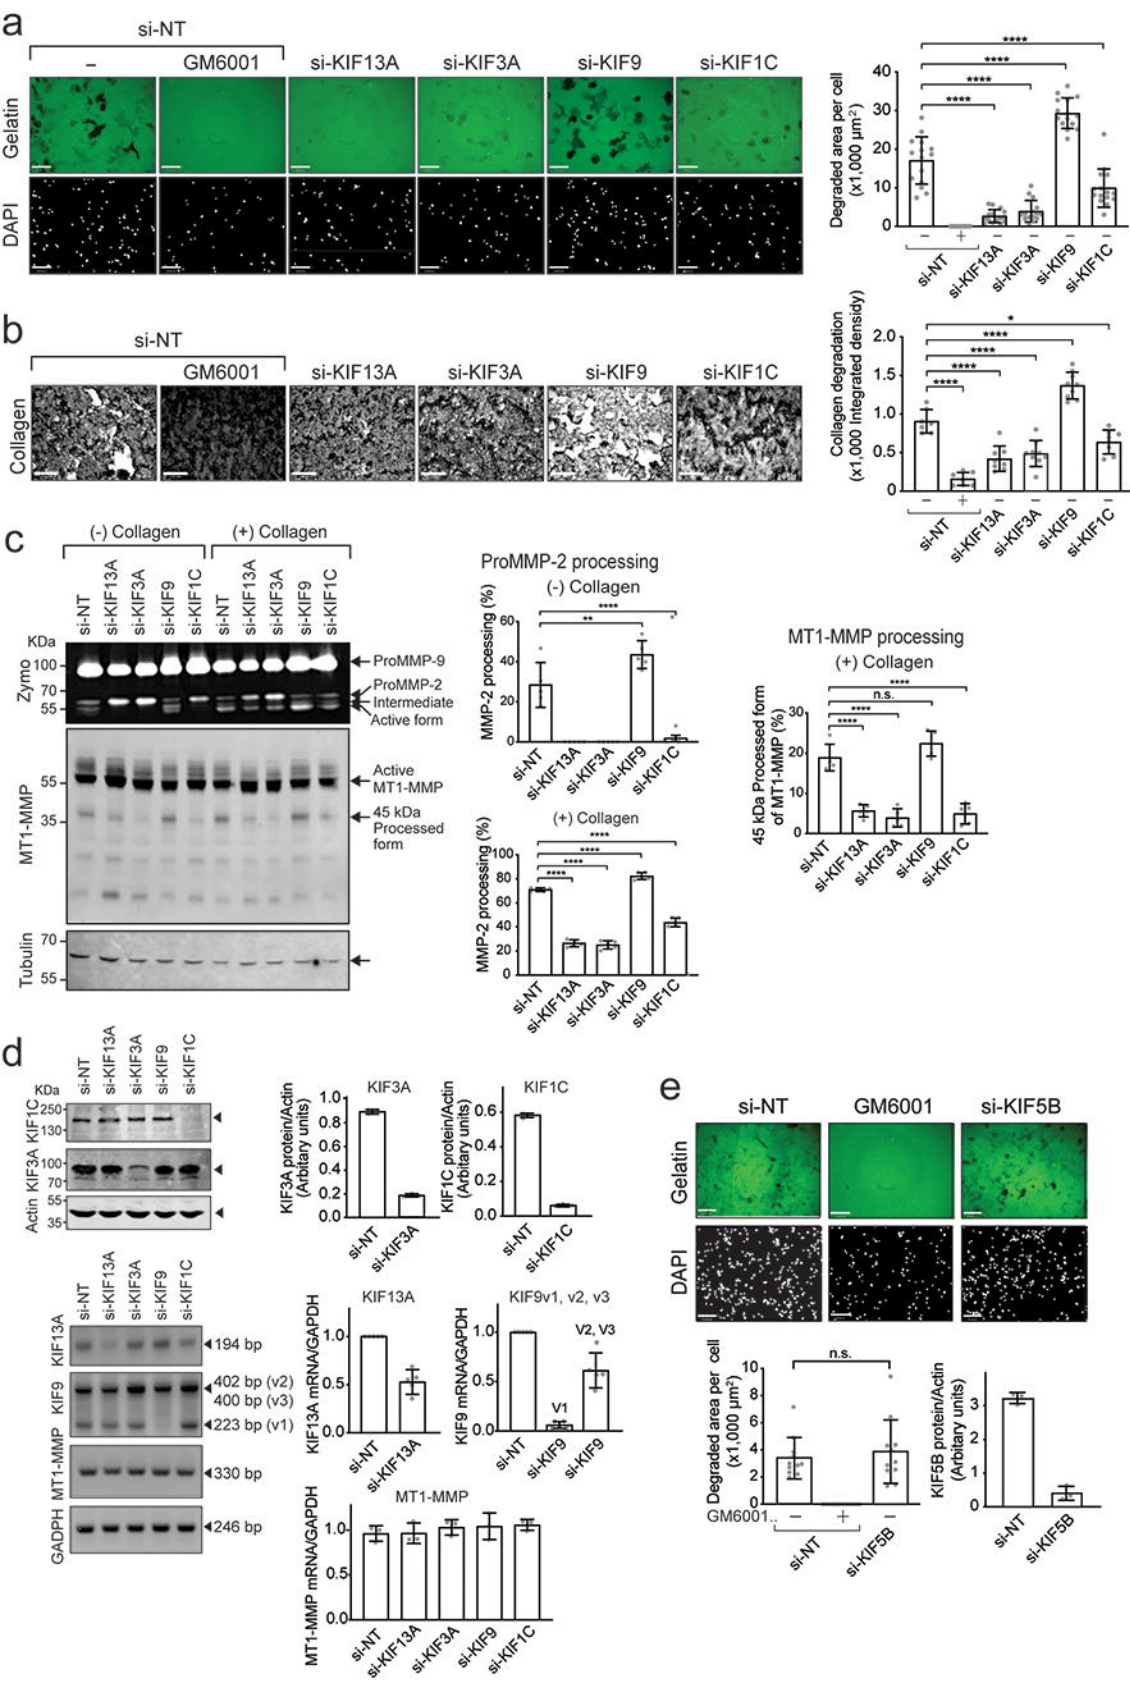

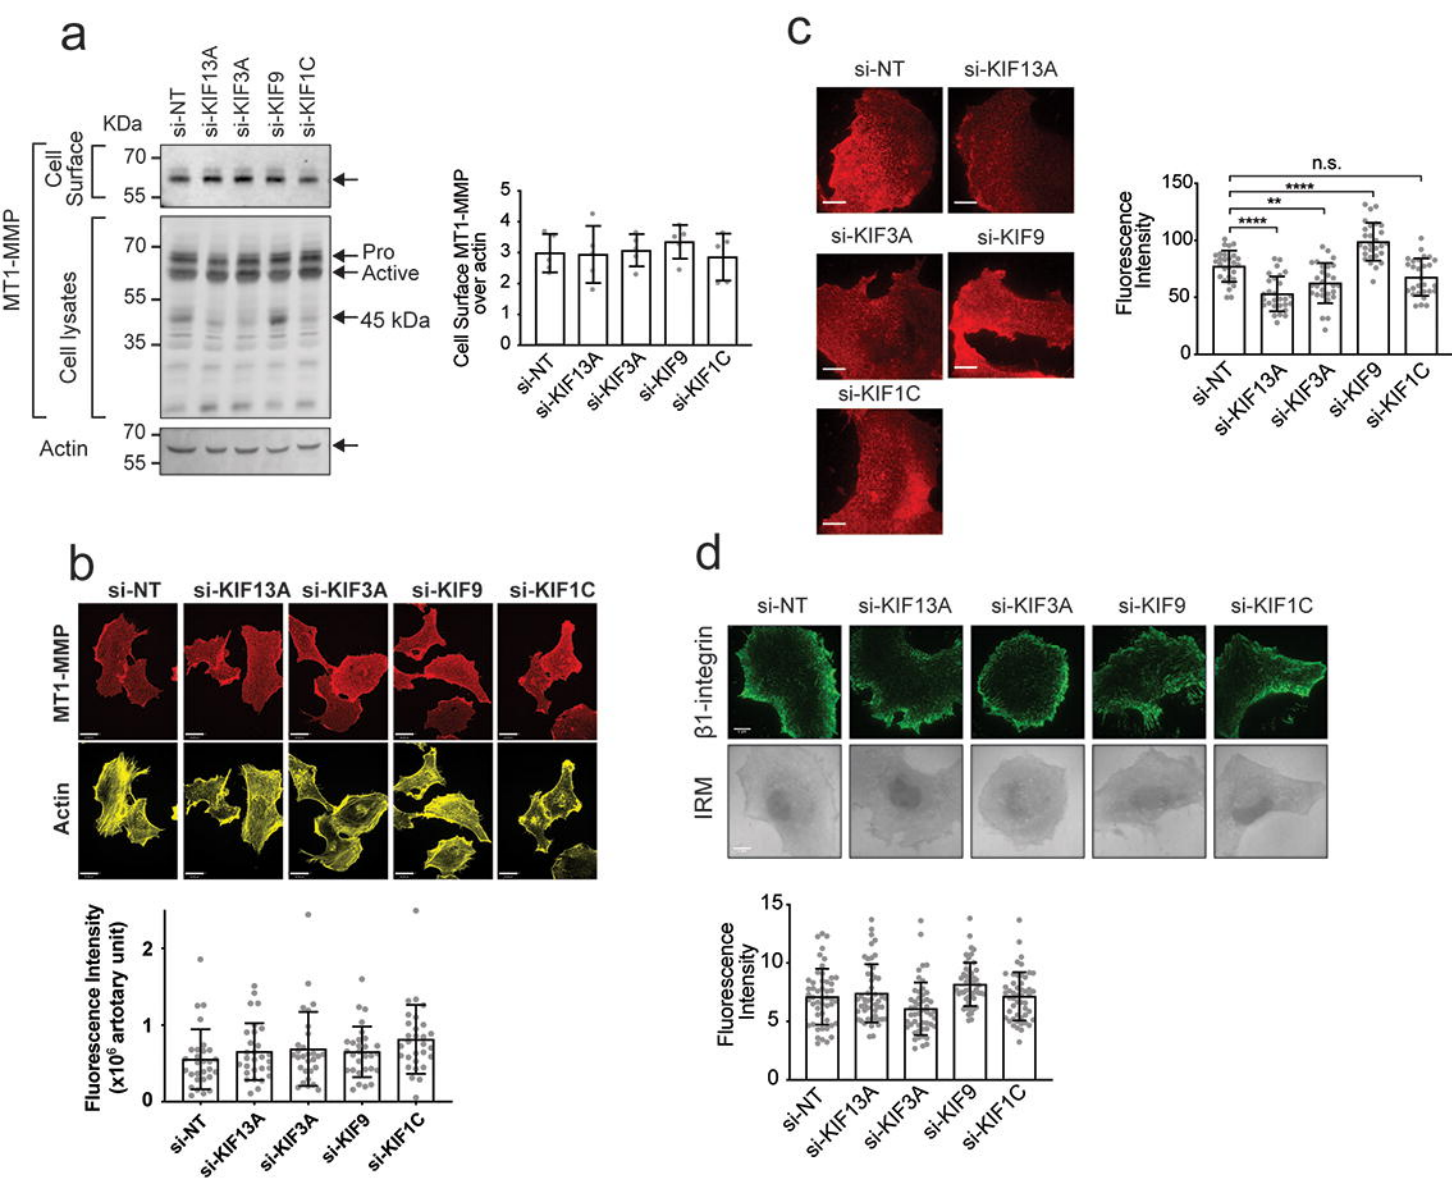



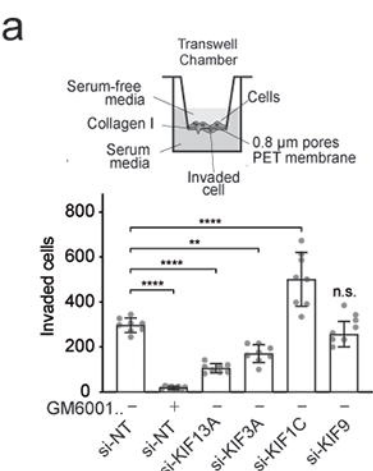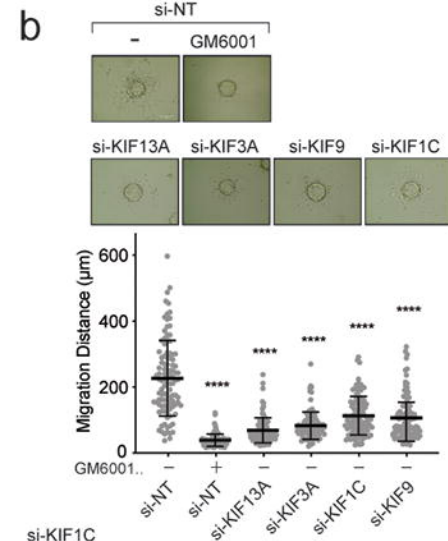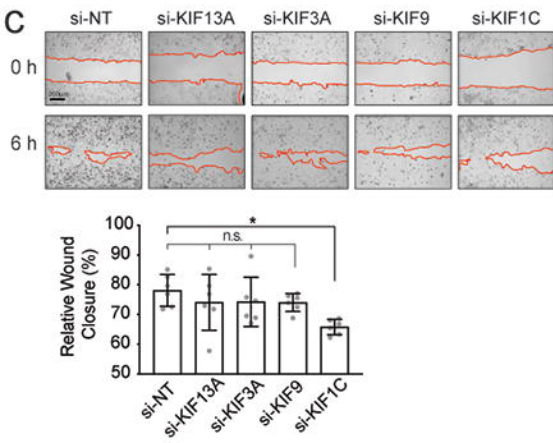

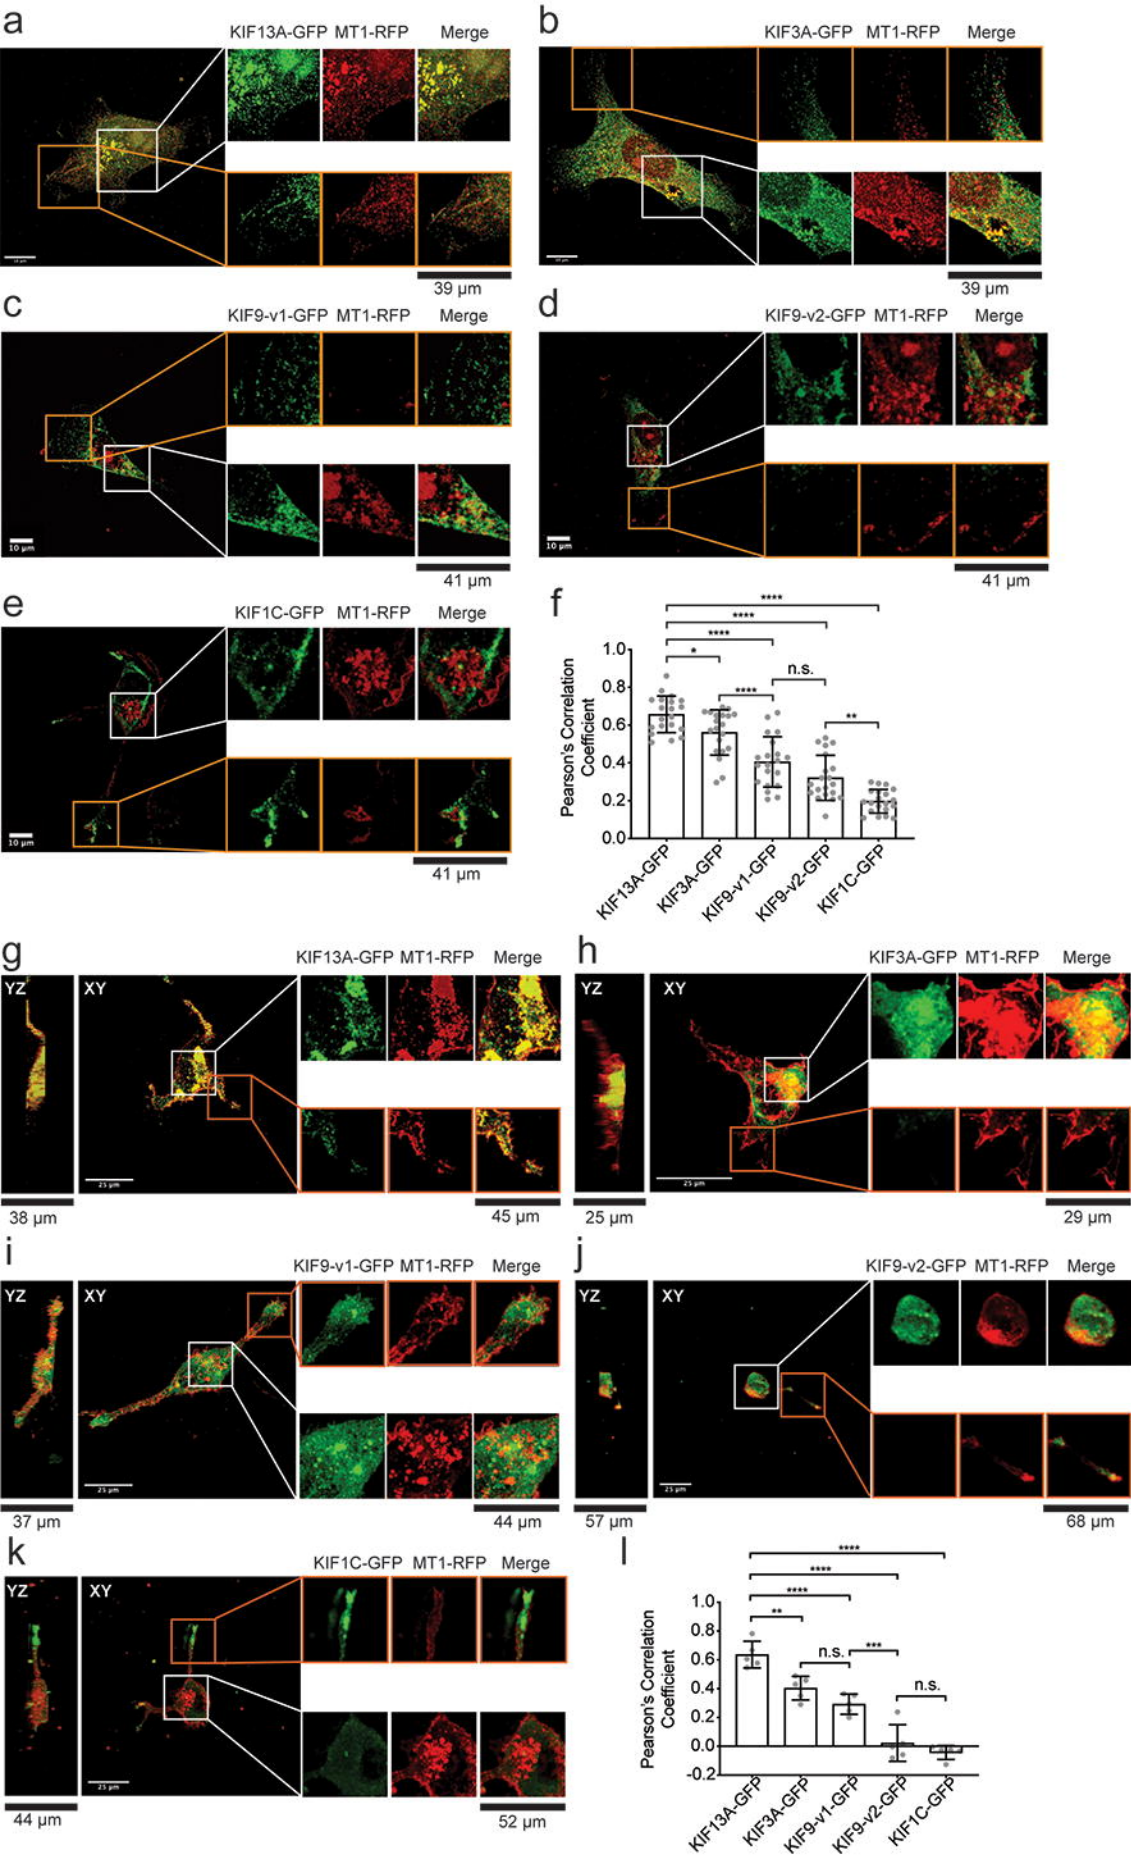

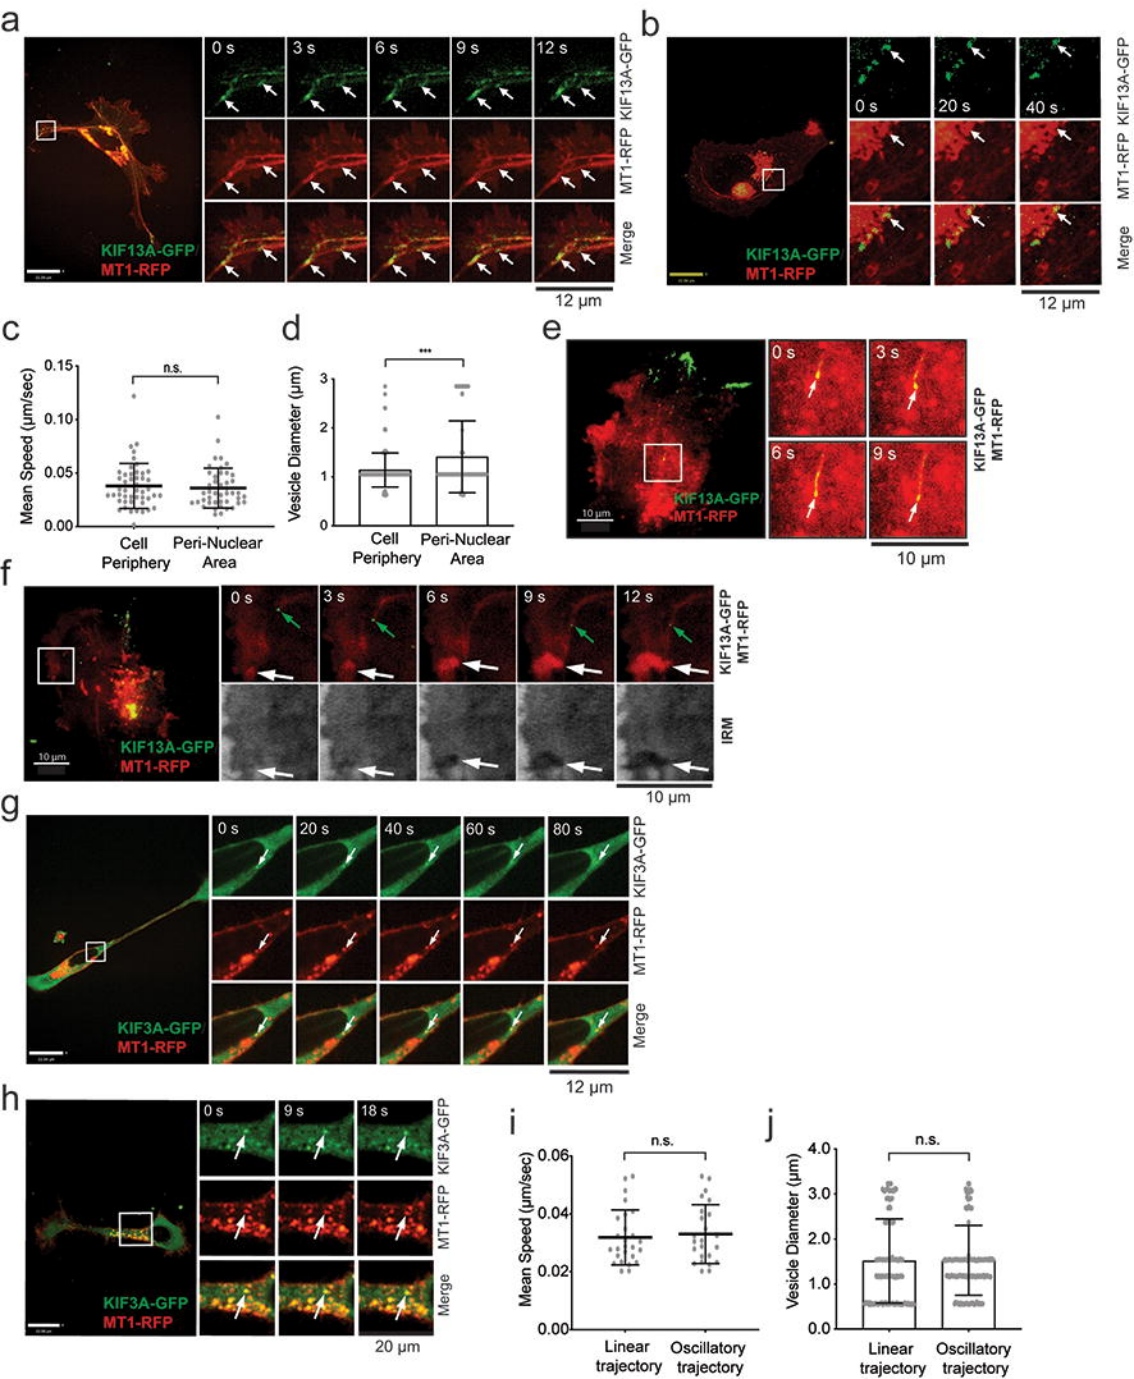

**a**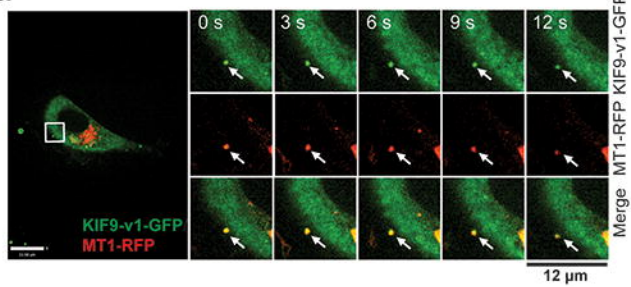**b**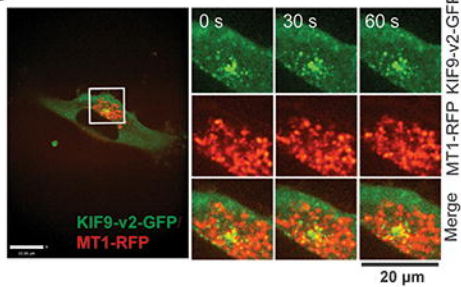**c**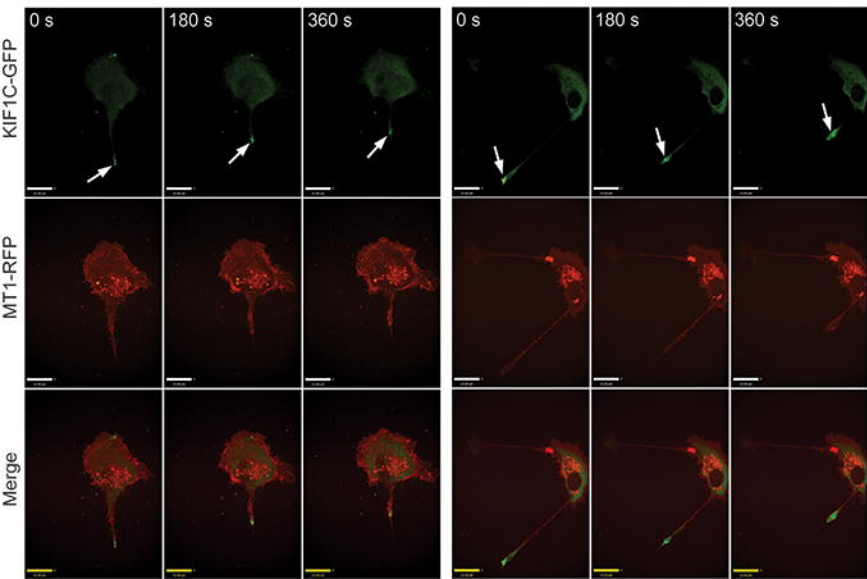





**a**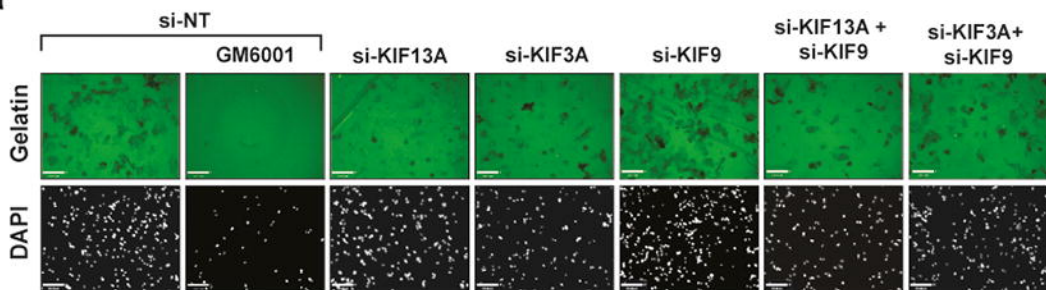**b**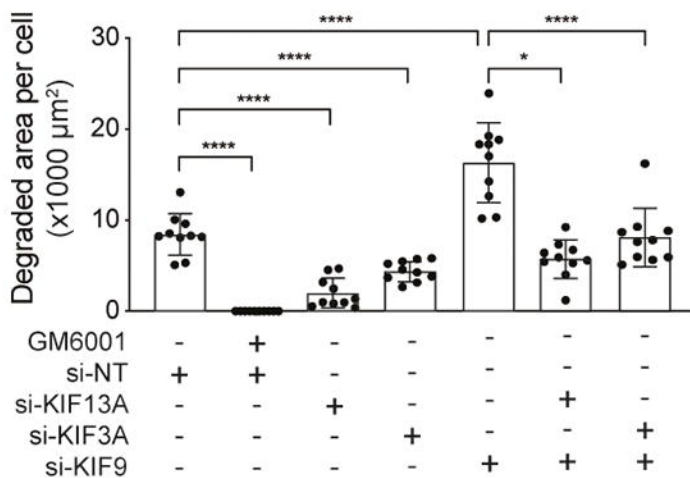**c**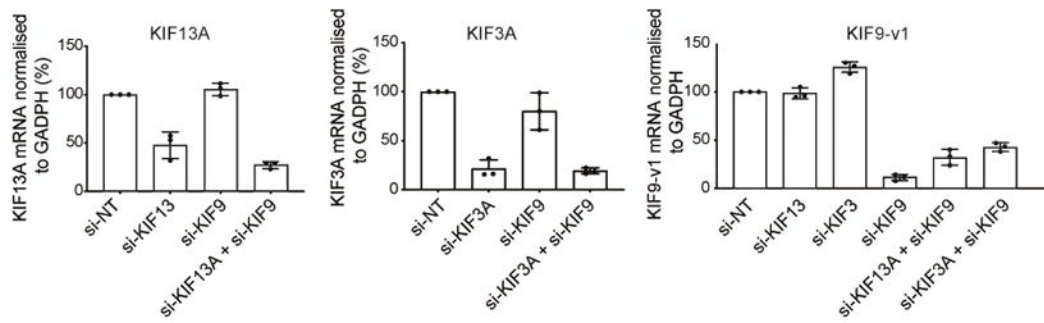

**a**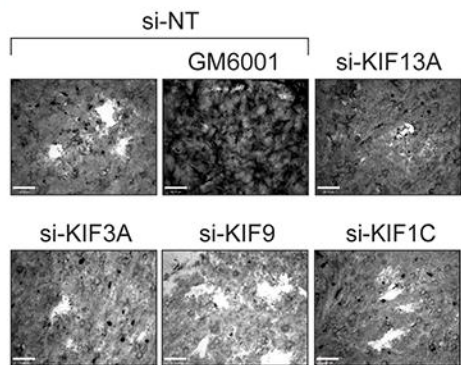**b**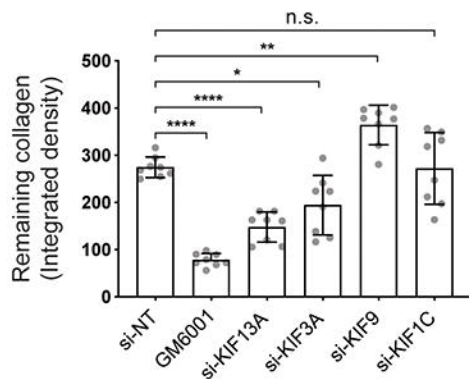**c**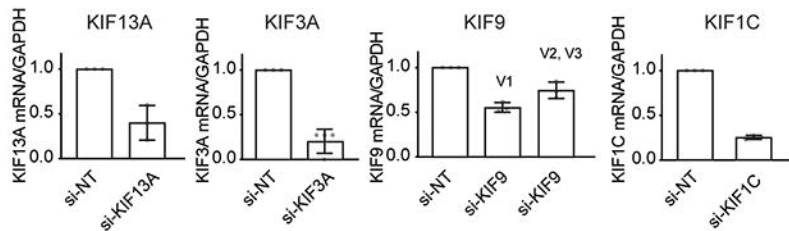**d**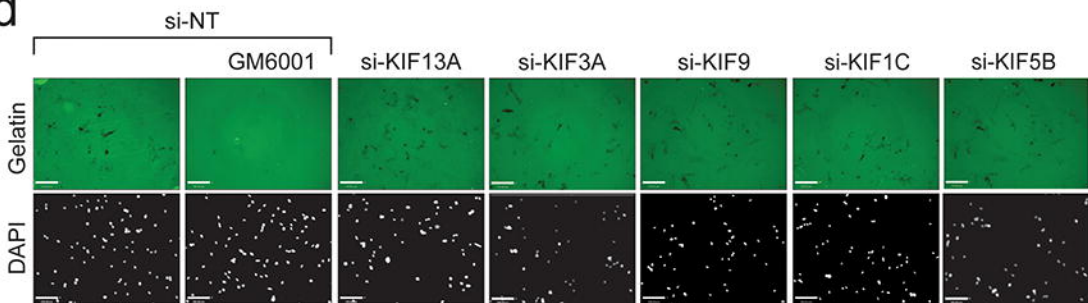**e**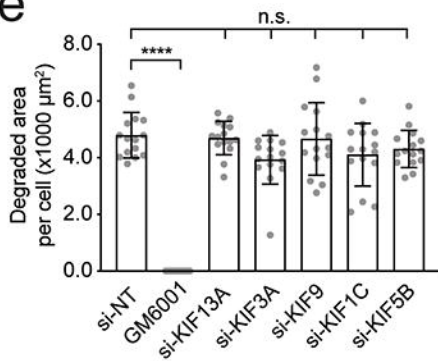**f**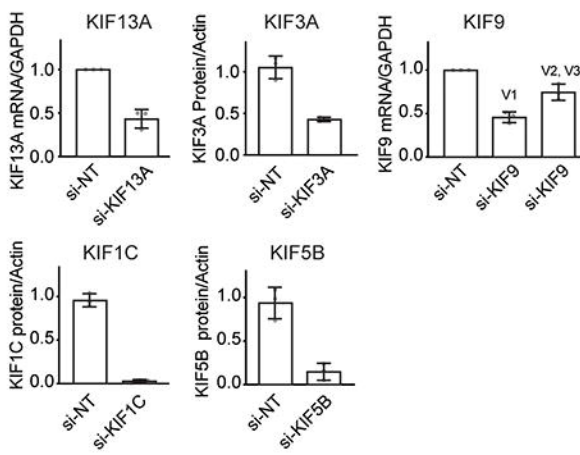

Source: https://www.biorxiv.org/content/biorxiv/early/2021/05/24/2021.05.24.445438.full.pdf
